# Supplementary material for: Defect chemistry of the BIMEVOXesElectronic supplementary information (ESI) available: full list of schemes for all combinations of l and CN generated using the program DEFEQN. A listing of the program is also available. See http://www.rsc.org/suppdata/jm/b2/b203992n/
Source: Royal Society of Chemistry journal article supplement (doi:10.1039/b203992n), 2002-09-27
Supplement: b203992n.doc [file b203992n.doc]

# Supplementary Information

# **Defect Chemistry of the BIMEVOXes**

**Isaac Abrahams and Franciszek Krok**

(1) SSLCN.FOR, listing of program SSLCN. Successfully compiled using Lahey Fortran F77-L3 and run on a Pentium 350 MHz PC.

(2) TABLES.OUT, Output listing from SSLCN containing theoretical solid solution limits for all combinations of *l* and *CN*.

(3) DEFEQN.FOR, listing of program DEFEQN. Successfully compiled using Lahey Fortran F77-L3 and run on a Pentium 350 MHz PC.

(4) DEFEQN.OUT, Output listing from DEFEQN containing substitution schemes for all combinations of *l* and *CN*.

**(1) Listing of program SSLCN.FOR**

program sslcn

c*** program to calculate theoretical solid solution limits

c**** in substituted BIMEVOXES

dimension essl(10,7),assl(10,7),essls(10,7),assls(10,7)

dimension esslu(10,7),asslu(10,7)

open(6,file='TABLES.OUT',status='UNKNOWN')

write(6,*)

write(6,*) ' Theoretical solid solution limits for BIMEVOXES'

write(6,*) ' l = metal dopant charge '

write(6,*) ' CN = metal dopant coordination number'

write(6,*)

do 10 ICN = 4,8

do 20 l=1,6

essl(icn,l)=99.0

assl(icn,l)=99.0

essls(icn,l)=99.0

assls(icn,l)=99.0

write(*,*) icn,l

if(icn.le.6) then

if(icn.ge.l) essl(icn,l) = 1.0/(icn+1.0-l)

if(icn.lt.l) essl(icn,l) = 1.0/(l-icn+1.0)

if((2.0*icn).ge.(l+6)) assl(icn,l)= 3.0/((2.0*icn)-3.0-l)

if((2.0*icn).lt.(l+6)) assl(icn,l)=1.0/(l+7-(2*icn))

endif

if(icn.gt.6) then

essls(icn,l) = 1.0/(icn+1.0-l)

esslu(icn,l) = 1.0/(2.0*icn-5.0-l)

asslu(icn,l)= 3.0/((2.0*icn)-3.0-l)

assls(icn,l) = 3.0/(icn+3.0-l)

endif

20 continue

10 continue

c**** Equatorial vacancy model

write(6,*) ' Equatorial vacancy only model 4 <= CN <= 6'

write(6,100) 4,5,6,7,8

100 format(3X,'l',5(' CN = ',i1))

do 30 l=1,6

write(6,200) l,(essl(icn,l),icn=4,6),(essls(jcn,l),jcn=7,8)

200 format(2X,'+',i1,5f8.4)

30 continue

write(6,*)

write(6,*) ' unshared oxygen model for high CN'

write(6,300) 7,8

300 format(3X,'l',2(' CN = ',i1))

do 40 l=1,6

write(6,200) l,(esslu(icn,l),icn=7,8)

40 continue

write(6,*)

c**** Apical vacancy model

write(6,*) ' Apical vacancy only model'

write(6,100) 4,5,6,7,8

do 50 l=1,6

write(6,200) l,(assl(icn,l),icn=4,6),(asslu(jcn,l),jcn=7,8)

50 continue

write(6,*)

write(6,*) ' Shared oxygen model for high CN'

write(6,300) 7,8

do 60 l=1,6

write(6,200) l,(assls(icn,l),icn=7,8)

60 continue

end

**(2) TABLES.OUT Output from program SSLCN**

Theoretical solid solution limits for BIMEVOXES

l = metal dopant charge

CN = metal dopant coordination number

Equatorial vacancy only model 4 <= CN <= 6

l CN = 4 CN = 5 CN = 6 CN = 7 CN = 8

+1 0.2500 0.2000 0.1667 0.1429 0.1250

+2 0.3333 0.2500 0.2000 0.1667 0.1429

+3 0.5000 0.3333 0.2500 0.2000 0.1667

+4 1.0000 0.5000 0.3333 0.2500 0.2000

+5 0.5000 1.0000 0.5000 0.3333 0.2500

+6 0.3333 0.5000 1.0000 0.5000 0.3333

unshared oxygen model for high CN

l CN = 7 CN = 8

+1 0.1250 0.1000

+2 0.1429 0.1111

+3 0.1667 0.1250

+4 0.2000 0.1429

+5 0.2500 0.1667

+6 0.3333 0.2000

Apical vacancy only model

l CN = 4 CN = 5 CN = 6 CN = 7 CN = 8

+1 0.7500 0.5000 0.3750 0.3000 0.2500

+2 1.0000 0.6000 0.4286 0.3333 0.2727

+3 0.5000 0.7500 0.5000 0.3750 0.3000

+4 0.3333 1.0000 0.6000 0.4286 0.3333

+5 0.2500 0.5000 0.7500 0.5000 0.3750

+6 0.2000 0.3333 1.0000 0.6000 0.4286

Shared oxygen model for high CN

l CN = 7 CN = 8

+1 0.3333 0.3000

+2 0.3750 0.3333

+3 0.4286 0.3750

+4 0.5000 0.4286

+5 0.6000 0.5000

+6 0.7500 0.6000

**(3) Listing of program DEFEQN.FOR**

program defeqn

c**** program to print out defect eqns for V substitution in

c**** BIMEVOX systems. CN = coordination no. of metal dopant

c**** l = charge of metal dopant. Valid for for all combinations

c**** of CN and l (CN = 4 to 8, l = 1 to 6)

open(6,file='defeqn.out',status='UNKNOWN')

do 10 icn=4,6

do 20 l=1,6

c**** Scheme 3a

if(icn.le.6.and.icn.gt.(l+1)) then

fac1= (icn+1-l)/2.0

fac2= (icn-1-l)/2.0

fac3=(icn-4)/2.0

fac4=(6-icn)/2.0

imef=5-l

sum1=-1.0*imef

sum2=(6-icn)+(icn-1-l)

write(6,100) icn,l

write(6,150) '3a'

if(icn.ne.6.and.(icn-1-l).ne.0)

+write(6,200) fac1,imef,1.0+fac3,fac4,fac2

if(icn.eq.6.and.(icn-1-l).ne.0)

+write(6,201) fac1,imef,1.0+fac3,fac2

if(icn.ne.6.and.(icn-1-l).eq.0)

+write(6,202) fac1,imef,1.0+fac3,fac4

if(icn.eq.6.and.(icn-1-l).eq.0)

+write(6,203) fac1,imef,1.0+fac3

write(6,180) sum1,sum2,sum1+sum2

100 format(//' EV model CN =',i2,' l = ',i2)

150 format(/'Substitution for vanadium octahedron. Scheme ',a3)

180 format(' Total effective -ve charge = ',f6.2,

+' Total effective +ve charge = ',f6.2,' Overall = ',f6.2)

200 format(f4.1,' { V(V) O(Oa,2) O(Oe,2) } --> { M(V)(',i2,''')'

+' O(Oa,2) O(Oe,',f4.1,') [](Oe,',f4.1,')(..) } + ',f4.1,

+' { V(V) O(Oa,2) O(Oe) [](Oe)(..) }')

201 format(f4.1,' { V(V) O(Oa,2) O(Oe,2) } --> { M(V)(',i2,''')'

+' O(Oa,2) O(Oe,',f4.1,') } + ',f4.1,

+' { V(V) O(Oa,2) O(Oe) [](Oe)(..) }')

202 format(f4.1,' { V(V) O(Oa,2) O(Oe,2) } --> { M(V)(',i2,''')'

+' O(Oa,2) O(Oe,',f4.1,') [](Oe,',f4.1,')(..) } ')

203 format(f4.1,' { V(V) O(Oa,2) O(Oe,2) } --> { M(V)(',i2,''')'

+' O(Oa,2) O(Oe,',f4.1,') }')

endif

c**** Scheme 4a

if(icn.le.6.and.icn.lt.(l+1)) then

fac1= (l+1-icn)/2.0

fac2=fac1

fac3=(icn-4)/2.0

fac4=(6-icn)/2.0

imef=5-l

if(imef.ge.0) then

sum1=-1.0*(imef+(l+1-icn))

sum2=6-icn

endif

if(imef.lt.0) then

sum1=-1.0*(l+1-icn)

sum2=-1.0*imef+(6-icn)

endif

write(6,100) icn,l

write(6,150) '4a'

if(icn.ne.6)

+write(6,2000) fac1,imef,1.0+fac3,fac4,fac2

if(icn.eq.6)

+write(6,2001) fac1,imef,1.0+fac3,fac2

write(6,180) sum1,sum2,sum1+sum2

2000 format(' { V(V) O(Oa,2) O(Oe,2) } + ',f4.1,

+' { V(V) O(Oa,2) O(Oe) [](Oe) } --> { M(V)(',i2,''')'

+' O(Oa,2) O(Oe,',f4.1,') [](Oe,',f4.1,')(..) } + ',f4.1,

+' { V(V) O(Oa,2) O(Oe) O(Oe)(") }')

2001 format(' { V(V) O(Oa,2) O(Oe,2) } + ',f4.1,

+' { V(V) O(Oa,2) O(Oe) [](Oe) } --> { M(V)(',i2,''')'

+' O(Oa,2) O(Oe,',f4.1,') } + ',f4.1,

+' { V(V) O(Oa,2) O(Oe) O(Oe)(") }')

endif

c**** Scheme 5a

if(icn.le.6.and.icn.eq.(l+1)) then

fac3=(icn-4)/2.0

fac4=(6-icn)/2.0

imef=5-l

sum1=-1.0*imef

sum2=6-icn

write(6,100) icn,l

write(6,150) '5a'

if(icn.eq.5) write(6,2010) imef,1.0+fac3,fac4

if(icn.eq.4) write(6,2011) imef,fac4

if(icn.eq.6) write(6,2012) imef,1.0+fac3

write(6,180) sum1,sum2,sum1+sum2

2010 format(' { V(V) O(Oa,2) O(Oe,2) } --> { M(V)(',i2,''')'

+' O(Oa,2) O(Oe,',f4.1,') [](Oe,',f4.1,')(..) }')

2011 format(' { V(V) O(Oa,2) O(Oe,2) } --> { M(V)(',i2,''')'

+' O(Oa,2) [](Oe,',f4.1,')(..) }')

2012 format(' { V(V) O(Oa,2) O(Oe,2) } --> { M(V)(',i2,''')'

+' O(Oa,2) O(Oe,',f4.1,') }')

endif

c**** Scheme 3b

if(icn.le.6.and.icn.gt.(l-1)) then

fac1= (icn+1-l)/2.0

fac2= fac1

fac3=(icn-4)/2.0

fac4=(6-icn)/2.0

imef=5-l

if(imef.ge.0) then

sum1=-1.0*(imef+(icn-4))

sum2=icn+1-l

endif

if(imef.lt.0) then

sum1=-1.0*(icn-4)

sum2=-1.0*imef+icn+1-l

endif

write(6,250) '3b'

if(icn.eq.5) write(6,300) fac1,imef,fac3,fac4,fac2

if(icn.eq.4) write(6,301) fac1,imef,fac4,fac2

if(icn.eq.6) write(6,302) fac1,imef,fac3,fac2

write(6,180) sum1,sum2,sum1+sum2

250 format(/'Substitution for vanadium tetrahedron. Scheme ',a3)

300 format(' { V(V) O(Oa,2) O(Oe) [](Oe) } + ',f4.1,

+' { V(V) O(Oa,2) O(Oe,2) } --> { M(V)(',i2,''') O(Oa,2)',

+' O(Oe) O(Oe,',f4.1,')" [](Oe,',f4.1,') } + ',f4.1,

+' { V(V) O(Oa,2) O(Oe) [](Oe)(..) }')

301 format(' { V(V) O(Oa,2) O(Oe) [](Oe) } + ',f4.1,

+' { V(V) O(Oa,2) O(Oe,2) } --> { M(V)(',i2,''') O(Oa,2)',

+' O(Oe) [](Oe,',f4.1,') } + ',f4.1,

+' { V(V) O(Oa,2) O(Oe) [](Oe)(..) }')

302 format(' { V(V) O(Oa,2) O(Oe) [](Oe) } + ',f4.1,

+' { V(V) O(Oa,2) O(Oe,2) } --> { M(V)(',i2,''') O(Oa,2)',

+' O(Oe) O(Oe,',f4.1,')" } + ',f4.1,

+' { V(V) O(Oa,2) O(Oe) [](Oe)(..) }')

endif

c**** Scheme 4b

if(icn.le.6.and.icn.lt.(l-1)) then

fac1= (l+1-icn)/2.0

fac2= (l-1-icn)/2.0

fac3=(icn-4)/2.0

fac4=(6-icn)/2.0

imef=5-l

if(imef.ge.0) then

sum1=-1.0*(imef+(icn-4)+(l-1-icn))

sum2=0.0

endif

if(imef.lt.0) then

sum1=-1.0*((icn-4)+(l-1-icn))

sum2=-1.0*imef

endif

write(6,250) '4b'

if(icn.ne.4.and.(l-1-icn).ne.0)

+write(6,3000) fac1,imef,fac3,fac4,fac2

if(icn.eq.4.and.(l-1-icn).ne.0)

+write(6,3001) fac1,imef,fac4,fac2

if(icn.ne.4.and.(l-1-icn).eq.0)

+write(6,3002) fac1,imef,fac3,fac4

if(icn.eq.4.and.(l-1-icn).eq.0)

+write(6,3003) fac1,imef,fac4

write(6,180) sum1,sum2,sum1+sum2

3000 format(f4.1,' { V(V) O(Oa,2) O(Oe) [](Oe) } --> { M(V)(',i2,

+''') O(Oa,2) O(Oe) O(Oe,',f4.1,')" [](Oe,',f4.1,') } + ',f4.1,

+' { V(V) O(Oa,2) O(Oe) O(Oe)" }')

3001 format(f4.1,' { V(V) O(Oa,2) O(Oe) [](Oe) } --> { M(V)(',i2,

+''') O(Oa,2) O(Oe) [](Oe,',f4.1,') } + ',f4.1,

+' { V(V) O(Oa,2) O(Oe) O(Oe)" }')

3002 format(f4.1,' { V(V) O(Oa,2) O(Oe) [](Oe) } --> { M(V)(',i2,

+''') O(Oa,2) O(Oe) O(Oe,',f4.1,')" [](Oe,',f4.1,') } ')

3003 format(f4.1,' { V(V) O(Oa,2) O(Oe) [](Oe) } --> { M(V)(',i2,

+''') O(Oa,2) O(Oe) [](Oe,',f4.1,') } ')

endif

c**** Scheme 5b

if(icn.le.6.and.icn.eq.(l-1)) then

fac3=(icn-4)/2.0

fac4=(6-icn)/2.0

imef=5-l

if(imef.ge.0) then

sum1=-1.0*(imef+icn-4)

sum2=0.0

endif

if(imef.lt.0) then

sum1=-1.0*(icn-4)

sum2=-1.0*imef

endif

write(6,250) '5b'

if(icn.eq.5) write(6,3010) imef,fac3,fac4

if(icn.eq.4) write(6,3011) imef,fac4

if(icn.eq.6) write(6,3012) imef,fac3

write(6,180) sum1,sum2,sum1+sum2

3010 format(' { V(V) O(Oa,2) O(Oe) [](Oe) } --> { M(V)(',i2,

+''') O(Oa,2) O(Oe) O(Oe,',f4.1,')" [](Oe,',f4.1,') }')

3011 format(' { V(V) O(Oa,2) O(Oe) [](Oe) } --> { M(V)(',i2,

+''') O(Oa,2) O(Oe) [](Oe,',f4.1,') }')

3012 format(' { V(V) O(Oa,2) O(Oe) [](Oe) } --> { M(V)(',i2,

+''') O(Oa,2) O(Oe) O(Oe,',f4.1,')" }')

endif

c**** Scheme 3c

if(icn.le.6.and.icn.gt.l) then

fac1=icn+1-l

fac2=icn-l

fac3=(icn-4)/2.0

fac4=(6-icn)/2.0

imef=5-l

ifac3=icn-5

ifac4=5-icn

if(imef.ge.0) then

sum1=-1.0*(imef+((icn-4)/2.0)*(iCN-5))

sum2=((6-icn)/2.0)*(5-icn)+(icn-l)

endif

if(imef.lt.0) then

sum1=-1.0*(((icn-4)/2.0)*(iCN-5))

sum2=((6-icn)/2.0)*(5-icn)+(icn-l)+(-1.0*imef)

endif

write(6,350) '3c'

if(icn.eq.5) write(6,400) fac1,imef,fac3,ifac3,fac4,ifac4,fac2

if(icn.eq.4) write(6,401) fac1,imef,fac4,ifac4,fac2

if(icn.eq.6) write(6,402) fac1,imef,fac3,ifac3,fac2

write(6,180) sum1,sum2,sum1+sum2

350 format(/'Substitution for average vanadium polyhedron. Scheme '

+,a3)

400 format(f4.1,' { V(V) O(Oa,2) O(Oe,1.5) [](Oe,0.5) } --> { M(V)('

+,i2,''') O(Oa,2) O(Oe) O(Oe,',f4.1,')(',i2,''') [](Oe,',f4.1,

+')(',i2,' .) } + ',f4.1,' { V(V) O(Oa,2) O(Oe) [](Oe)(.) }')

401 format(f4.1,' { V(V) O(Oa,2) O(Oe,1.5) [](Oe,0.5) } --> { M(V)('

+,i2,''') O(Oa,2) O(Oe) [](Oe,',f4.1,

+')(',i2,' .) } + ',f4.1,' { V(V) O(Oa,2) O(Oe) [](Oe)(.) }')

402 format(f4.1,' { V(V) O(Oa,2) O(Oe,1.5) [](Oe,0.5) } --> { M(V)('

+,i2,''') O(Oa,2) O(Oe) O(Oe,',f4.1,')(',i2,''') } + ',f4.1,

+' { V(V) O(Oa,2) O(Oe) [](Oe)(.) }')

endif

c**** Scheme 4c

if(icn.le.6.and.icn.lt.l) then

fac1=l-icn+1

fac2=l-icn

fac3=(icn-4)/2.0

fac4=(6-icn)/2.0

imef=5-l

ifac3=icn-5

ifac3=5-icn

if(imef.ge.0) then

sum1=-1.0*(imef+((icn-4)/2.0)*(iCN-5)+(l-icn))

sum2=((6-icn)/2.0)*(5-icn)

endif

if(imef.lt.0) then

sum1=-1.0*(((icn-4)/2.0)*(iCN-5)+(l-icn))

sum2=((6-icn)/2.0)*(5-icn)+(-1.0*imef)

endif

write(6,350) '4c'

if(icn.eq.5) write(6,4000) fac1,imef,fac3,ifac3,fac4,ifac4,fac2

if(icn.eq.4) write(6,4001) fac1,imef,fac4,ifac4,fac2

if(icn.eq.6) write(6,4002) fac1,imef,fac3,ifac3,fac2

write(6,180) sum1,sum2,sum1+sum2

4000 format(f4.1,' { V(V) O(Oa,2) O(Oe,1.5) [](Oe,0.5) } --> { M(V)('

+,i2,''') O(Oa,2) O(Oe) O(Oe,',f4.1,')(',i2,')',''' [](Oe,',f4.1,

+')(',i2,' .) } + ',f4.1,' { V(V) O(Oa,2) O(Oe) O(Oe)',''' }')

4001 format(f4.1,' { V(V) O(Oa,2) O(Oe,1.5) [](Oe,0.5) } --> { M(V)('

+,i2,''') O(Oa,2) O(Oe) [](Oe,',f4.1,

+')(',i2,' .) } + ',f4.1,' { V(V) O(Oa,2) O(Oe) O(Oe)',''' }')

4002 format(f4.1,' { V(V) O(Oa,2) O(Oe,1.5) [](Oe,0.5) } --> { M(V)('

+,i2,''') O(Oa,2) O(Oe) O(Oe,',f4.1,')(',i2,')'''

+'} + ',f4.1,' { V(V) O(Oa,2) O(Oe) O(Oe)',''' }')

endif

c**** Scheme 5c

if(icn.le.6.and.icn.eq.l) then

fac3=(icn-4)/2.0

fac4=(6-icn)/2.0

imef=5-l

ifac3=icn-5

ifac4=5-icn

if(imef.ge.0) then

sum1=-1.0*(imef+((icn-4)/2.0)*(iCN-5))

sum2=((6-icn)/2.0)*(5-icn)

endif

if(imef.lt.0) then

sum1=-1.0*(((icn-4)/2.0)*(iCN-5))

sum2=-1.0*imef+((6-icn)/2.0)*(5-icn)

endif

write(6,350) '5c'

if(icn.eq.5) write(6,4010) imef,fac3,ifac3,fac4,ifac4

if(icn.eq.4) write(6,4011) imef,fac4,ifac4

if(icn.eq.6) write(6,4012) imef,fac3,ifac3

write(6,180) sum1,sum2,sum1+sum2

4010 format(' { V(V) O(Oa,2) O(Oe,1.5) [](Oe,0.5) } --> { M(V)('

+,i2,''') O(Oa,2) O(Oe) O(Oe,',f4.1,')(',i2,''') [](Oe,',f4.1,

+')(',i2,' .) } ')

4011 format(' { V(V) O(Oa,2) O(Oe,1.5) [](Oe,0.5) } --> { M(V)('

+,i2,''') O(Oa,2) O(Oe) [](Oe,',f4.1,

+')(',i2,' .) } ')

4012 format(' { V(V) O(Oa,2) O(Oe,1.5) [](Oe,0.5) } --> { M(V)('

+,i2,''') O(Oa,2) O(Oe) O(Oe,',f4.1,')(',i2,''') } ')

endif

c**** Scheme 6a

if(icn.le.6.and.(2*icn).gt.(l+7)) then

fac1= (2.0*icn-3-l)/4.0

fac2= (2.0*icn-7-l)/4.0

fac3=(icn-4)

fac4=(6-icn)

imef=5-l

sum1=-1.0*imef

sum2=2.0*(6-icn)+(4.0*fac2)

write(6,1000) icn,l

write(6,150) '6a'

if(icn.eq.5) write(6,2020) fac1,imef,fac3,fac4,fac2

if(icn.eq.4) write(6,2021) fac1,imef,fac4,fac2

if(icn.eq.6) write(6,2022) fac1,imef,fac3,fac2

write(6,180) sum1,sum2,sum1+sum2

1000 format(//' AV model CN =',i2,' l = ',i2)

2020 format(f6.3,' { V(V) O(Oa,2) O(Oe,2) } --> { M(V)(',i2,''')'

+' O(Oa,',f4.1,') [](Oa,',f4.1,')(..) O(Oe,2) } + ',f6.3,

+' { V(V) [](Oa,2)(..) O(Oe,2) }')

2021 format(f6.3,' { V(V) O(Oa,2) O(Oe,2) } --> { M(V)(',i2,''')'

+' [](Oa,',f4.1,')(..) O(Oe,2) } + ',f6.3,

+' { V(V) [](Oa,2)(..) O(Oe,2) }')

2022 format(f6.3,' { V(V) O(Oa,2) O(Oe,2) } --> { M(V)(',i2,''')'

+' O(Oa,',f4.1,') O(Oe,2) } + ',f6.3,

+' { V(V) [](Oa,2)(..) O(Oe,2) }')

endif

c**** Scheme 7a

if(icn.le.6.and.(2*icn).lt.(l+7)) then

fac1= (l+7-2.0*icn)/4.0

fac2=fac1

fac3=(icn-4)

fac4=(6-icn)

imef=5-l

if(imef.ge.0) then

sum1=-1.0*(imef+(4.0*fac2))

sum2=2.0*(6-icn)

endif

if(imef.lt.0) then

sum1=-1.0*((4.0*fac2))

sum2=2.0*(6-icn)+(-1.0*imef)

endif

write(6,1000) icn,l

write(6,150) '7a'

if(icn.eq.5) write(6,2030) fac1,imef,fac3,fac4,fac2

if(icn.eq.4) write(6,2031) fac1,imef,fac4,fac2

if(icn.eq.6) write(6,2032) fac1,imef,fac3,fac2

write(6,180) sum1,sum2,sum1+sum2

2030 format(' { V(V) O(Oa,2) O(Oe,2) } + ',f6.3,

+' { V(V) [](Oa,2) O(Oe,2) } --> { M(V)(',i2,''')'

+' O(Oa,',f4.1,') [](Oa,'f4.1,')(..) O(Oe,2) } + ',f6.3,

+' { V(V) O(Oa,2)(") O(Oe,2) }')

2031 format(' { V(V) O(Oa,2) O(Oe,2) } + ',f6.3,

+' { V(V) [](Oa,2) O(Oe,2) } --> { M(V)(',i2,''')'

+' [](Oa,'f4.1,')(..) O(Oe,2) } + ',f6.3,

+' { V(V) O(Oa,2)(") O(Oe,2) }')

2032 format(' { V(V) O(Oa,2) O(Oe,2) } + ',f6.3,

+' { V(V) [](Oa,2) O(Oe,2) } --> { M(V)(',i2,''')'

+' O(Oa,',f4.1,') O(Oe,2) } + ',f6.3,

+' { V(V) O(Oa,2)(") O(Oe,2) }')

endif

c**** Scheme 8a

if(icn.le.6.and.((2*icn)-(l+7)).eq.0) then

fac3=(icn-4)

fac4=(6-icn)

imef=5-l

sum1=-1.0*imef

sum2=2.0*(6-icn)

write(6,1000) icn,l

write(6,150) '8a'

if(icn.eq.5) write(6,2040) imef,fac3,fac4

if(icn.eq.4) write(6,2041) imef,fac4

if(icn.eq.6) write(6,2042) imef,fac3

write(6,180) sum1,sum2,sum1+sum2

2040 format(' { V(V) O(Oa,2) O(Oe,2) } --> { M(V)(',i2,''')'

+' O(Oa,',f4.1,') [](Oa,',f4.1,')(..) O(Oe,2) }')

2041 format(' { V(V) O(Oa,2) O(Oe,2) } --> { M(V)(',i2,''')'

+' [](Oa,',f4.1,')(..) O(Oe,2) }')

2042 format(' { V(V) O(Oa,2) O(Oe,2) } --> { M(V)(',i2,''')'

+' O(Oa,',f4.1,') O(Oe,2) }')

endif

c**** Scheme 6b

if(icn.le.6.and.(2*icn).gt.(l+3)) then

fac1= (2.0*icn-3-l)/4.0

fac2= fac1

fac3=(icn-4)

fac4=(6-icn)

imef=5-l

if(imef.ge.0) then

sum1=-1.0*(imef+2.0*(icn-4))

sum2=fac2*4.0

endif

if(imef.lt.0) then

sum1=-1.0*(2.0*(icn-4))

sum2=fac2*4.0+(-1.0*imef)

endif

write(6,250) '6b'

if(icn.eq.5) write(6,3020) fac1,imef,fac3,fac4,fac2

if(icn.eq.4) write(6,3021) fac1,imef,fac4,fac2

if(icn.eq.6) write(6,3022) fac1,imef,fac3,fac2

write(6,180) sum1,sum2,sum1+sum2

3020 format(' { V(V) [](Oa,2) O(Oe,2) } + ',f6.3,

+' { V(V) O(Oa,2) O(Oe,2) } --> { M(V)(',i2,''') O(Oa,',

+f4.1,')(") [](Oa,',f4.1,') O(Oe,2) } + ',f6.3,

+' { V(V) [](Oa,2)(..) O(Oe,2) }')

3021 format(' { V(V) [](Oa,2) O(Oe,2) } + ',f6.3,

+' { V(V) O(Oa,2) O(Oe,2) } --> { M(V)(',i2,''') ',

+'[](Oa,',f4.1,') O(Oe,2) } + ',f6.3,

+' { V(V) [](Oa,2)(..) O(Oe,2) }')

3022 format(' { V(V) [](Oa,2) O(Oe,2) } + ',f6.3,

+' { V(V) O(Oa,2) O(Oe,2) } --> { M(V)(',i2,''') O(Oa,',

+f4.1,')(") O(Oe,2) } + ',f6.3,

+' { V(V) [](Oa,2)(..) O(Oe,2) }')

endif

c**** Scheme 7b

if(icn.le.6.and.(2*icn).lt.(l+3)) then

fac1= (l+7-2.0*icn)/4.0

fac2= (l+3-2.0*icn)/4.0

fac3=(icn-4)

fac4=(6-icn)

imef=5-l

if(imef.ge.0) then

sum1=-1.0*(imef+2.0*(icn-4)+fac2*4.0)

sum2=0.0

endif

if(imef.lt.0) then

sum1=-1.0*(2.0*(icn-4)+fac2*4.0)

sum2=-1.0*imef

endif

write(6,250) '7b'

if(icn.eq.5) write(6,3030) fac1,imef,fac3,fac4,fac2

if(icn.eq.4) write(6,3031) fac1,imef,fac4,fac2

if(icn.eq.6) write(6,3032) fac1,imef,fac3,fac4

write(6,180) sum1,sum2,sum1+sum2

3030 format(f6.3,' { V(V) [](Oa,2) O(Oe,2) } --> { M(V)(',i2,

+''') O(Oa,',f4.1,')(") [](Oa,',f4.1,') O(Oe,2) } + ',f6.3,

+' { V(V) O(Oa,2)(") O(Oe,2) }')

3031 format(f6.3,' { V(V) [](Oa,2) O(Oe,2) } --> { M(V)(',i2,

+''') [](Oa,',f4.1,') O(Oe,2) } + ',f6.3,

+' { V(V) O(Oa,2)(") O(Oe,2) }')

3032 format(f6.3,' { V(V) [](Oa,2) O(Oe,2) } --> { M(V)(',i2,

+''') O(Oa,',f4.1,')(") O(Oe,2) } + ',f6.3,

+' { V(V) O(Oa,2)(") O(Oe,2) }')

endif

c**** Scheme 8b

if(icn.le.6.and.((2*icn)-(l+3)).eq.0) then

fac3=(icn-4)

fac4=(6-icn)

imef=5-l

if(imef.ge.0) then

sum1=-1.0*(imef+2.0*(icn-4))

sum2=0.0

endif

if(imef.lt.0) then

sum1=-1.0*(2.0*(icn-4))

sum2=-1.0*imef

endif

write(6,250) '8b'

if(icn.eq.5) write(6,3040) imef,fac3,fac4

if(icn.eq.4) write(6,3041) imef,fac4

if(icn.eq.6) write(6,3042) imef,fac3

write(6,180) sum1,sum2,sum1+sum2

3040 format(' { V(V) [](Oa,2) O(Oe,2) } --> { M(V)(',i2,

+''') O(Oa,',f4.1,')(") [](Oa,',f4.1,') O(Oe,2) }')

3041 format(' { V(V) [](Oa,2) O(Oe,2) } --> { M(V)(',i2,

+''') [](Oa,',f4.1,') O(Oe,2) }')

3042 format(' { V(V) [](Oa,2) O(Oe,2) } --> { M(V)(',i2,

+''') O(Oa,',f4.1,')(") O(Oe,2) }')

endif

c**** Scheme 6c

if(icn.le.6.and.(2*icn).gt.(l+6)) then

fac1=(2.0*icn-3-l)/3.0

fac2=(2.0*icn-6-l)/3.0

fac3=(icn-4)

fac4=(6-icn)

fac5=(5.5-icn)*(5-icn)

fac6=(5.5-icn)*(icn-3)

imef=5-l

if(imef.ge.0) then

sum1=-1.0*(imef+(icn-4)*fac5)

sum2=fac2*3+fac6*(6-icn)

endif

if(imef.lt.0) then

sum1=-1.0*((icn-4)*fac5)

sum2=-1.0*imef+fac2*3+fac6*(6-icn)

endif

write(6,350) '6c'

if(icn.eq.5) write(6,4020) fac1,imef,fac3,fac5,fac4,fac6,fac2

if(icn.eq.4) write(6,4021) fac1,imef,fac4,fac6,fac2

if(icn.eq.6) write(6,4022) fac1,imef,fac3,fac5,fac2

write(6,180) sum1,sum2,sum1+sum2

4020 format(f6.3,' { V(V) O(Oa,1.5) [](Oa,0.5) O(Oe,2) } --> { M(V)'

+,'(',i2,''') O(Oa,',f4.1,')(',f4.1,''') [](Oa,',f4.1,

+')(',f4.1,' .) O(Oe,2) } + ',

+f6.3,' { V(V) [](Oa,2)(1.5 .) O(Oe,2) }')

4021 format(f6.3,' { V(V) O(Oa,1.5) [](Oa,0.5) O(Oe,2) } --> { M(V)'

+,'(',i2,''') [](Oa,',f4.1,

+')(',f4.1,' .) O(Oe,2) } + ',

+f6.3,' { V(V) [](Oa,2)(1.5 .) O(Oe,2) }')

4022 format(f6.3,' { V(V) O(Oa,1.5) [](Oa,0.5) O(Oe,2) } --> { M(V)'

+,'(',i2,''') O(Oa,',f4.1,')(',f4.1,''') ',

+' O(Oe,2) } + ',

+f6.3,' { V(V) [](Oa,2)(1.5 .) O(Oe,2) }')

endif

c**** Scheme 7c

if(icn.le.6.and.(2*icn).lt.(l+6)) then

fac1=l+7-2.0*icn

fac2=l+6-2.0*icn

fac3=(icn-4)

fac4=(6-icn)

fac5=(5.5-icn)*(5-icn)

fac6=(5.5-icn)*(icn-3)

imef=5-l

if(imef.ge.0) then

sum1=-1.0*(imef+fac5*(icn-4)+fac2)

sum2=fac6*(6-icn)

endif

if(imef.lt.0) then

sum1=-1.0*(fac5*(icn-4)+fac2)

sum2=-1.0*imef+fac6*(6-icn)

endif

write(6,350) '7c'

if(icn.eq.5) write(6,4030) fac1,imef,fac3,fac5,fac4,fac6,fac2

if(icn.eq.4) write(6,4031) fac1,imef,fac4,fac6,fac2

if(icn.eq.6) write(6,4032) fac1,imef,fac3,fac5,fac2

write(6,180) sum1,sum2,sum1+sum2

4030 format(f6.3,' { V(V) O(Oa,1.5) [](Oa,0.5) O(Oe,2) } --> { M(V)'

+,'(',i2,''') O(Oa,',f4.1,')(',f4.1,''') [](Oa,',f4.1,')(',

+f4.1,' .) O(Oe,2) } + ',

+f6.3,' { V(V) O(Oa,2)(0.5',''') O(Oe,2) }')

4031 format(f6.3,' { V(V) O(Oa,1.5) [](Oa,0.5) O(Oe,2) } --> { M(V)'

+,'(',i2,''') [](Oa,',f4.1,')(',

+f4.1,' .) O(Oe,2) } + ',

+f6.3,' { V(V) O(Oa,2)(0.5',''') O(Oe,2) }')

4032 format(f6.3,' { V(V) O(Oa,1.5) [](Oa,0.5) O(Oe,2) } --> { M(V)'

+,'(',i2,''') O(Oa,',f4.1,')(',f4.1,''')',

+' O(Oe,2) } + ',

+f6.3,' { V(V) O(Oa,2)(0.5',''') O(Oe,2) }')

endif

c**** Scheme 8c

if(icn.le.6.and.((2*icn)-(l+6)).eq.0) then

fac3=(icn-4)

fac4=(6-icn)

fac5=(5.5-icn)*(5-icn)

fac6=(5.5-icn)*(icn-3)

imef=5-l

if(imef.ge.0) then

sum1=-1.0*(imef+(icn-4)*fac5)

sum2=(6-icn)*fac6

endif

if(imef.lt.0) then

sum1=-1.0*((icn-4)*fac5)

sum2=-1.0*imef+(6-icn)*fac6

endif

write(6,350) '8c'

if(icn.eq.5) write(6,4040) imef,fac3,fac5,fac4,fac6

if(icn.eq.4) write(6,4041) imef,fac4,fac6

if(icn.eq.6) write(6,4042) imef,fac3,fac5

write(6,180) sum1,sum2,sum1+sum2

4040 format(' { V(V) O(Oa,1.5) [](Oa,0.5) O(Oe,2) } --> { M(V)'

+,'(',i2,''') O(Oa,',f4.1,')(',f4.1,''') [](Oa,',f4.1,')(',

+f4.1,' .) O(Oe,2) }')

4041 format(' { V(V) O(Oa,1.5) [](Oa,0.5) O(Oe,2) } --> { M(V)'

+,'(',i2,''') [](Oa,',f4.1,')(',

+f4.1,' .) O(Oe,2) }')

4042 format(' { V(V) O(Oa,1.5) [](Oa,0.5) O(Oe,2) } --> { M(V)'

+,'(',i2,''') O(Oa,',f4.1,')(',f4.1,''') ',

+' O(Oe,2) }')

endif

20 continue

10 continue

do 30 icn=7,8

do 40 l=1,6

c**** Schemes 9a-c

fac1= (icn+1-l)/2.0

fac2= (icn-1-l)/2.0

fac3=(icn-6)/2.0

fac4=(6-icn)/2.0

ifac5=(icn+1-l)

ifac6=(icn-l)

imef=5-l

if(imef.ge.0) then

sum1=-1.0*(imef+(icn-6))

sum2=2.0*fac2

sum3=-1.0*(imef+(icn-6)+2)

sum4=2.0*fac1

sum5=-1.0*(imef+1+(icn-6))

sum6=ifac6

endif

if(imef.lt.0) then

sum1=-1.0*((icn-6))

sum2=2.0*fac2+(-1.0*imef)

sum3=-1.0*((icn-6)+2)

sum4=2.0*fac1+(-1.0*imef)

sum5=-1.0*(1+(icn-6))

sum6=ifac6+(-1.0*imef)

endif

write(6,5000) icn,l

write(6,150) '9a'

if((icn-1-l).ne.0) write(6,2050) fac1,imef,fac3,fac2

if((icn-1-l).eq.0) write(6,2051) fac1,imef,fac3

write(6,180) sum1,sum2,sum1+sum2

write(6,250) '9b'

write(6,3050) fac1,imef,fac3,fac1

write(6,180) sum3,sum4,sum3+sum4

write(6,350) '9c'

write(6,4050) ifac5,imef,fac3,ifac6

write(6,180) sum5,sum6,sum5+sum6

5000 format(//' EV model shared interstitials CN =',i2,' l = ',i2)

2050 format(f4.1,' { V(V) O(Oa,2) O(Oe,2) } --> { M(V)(',i2,''')'

+' O(Oa,2) O(Oe,2) O(Ois,',f4.1,')(") } + ',f4.1,

+' { V(V) O(Oa,2) O(Oe) [](Oe)(..) }')

2051 format(f4.1,' { V(V) O(Oa,2) O(Oe,2) } --> { M(V)(',i2,''')'

+' O(Oa,2) O(Oe,2) O(Ois,',f4.1,')(") } ')

3050 format(' { V(V) O(Oa,2) O(Oe) [](Oe) } + ',f4.1,

+'{ V(V) O(Oa,2) O(Oe,2) } --> { M(V)(',i2,''')'

+' O(Oa,2) O(Oe) O(Oe)(") O(Ois,',f4.1,')(") } + ',f4.1,

+' { V(V) O(Oa,2) O(Oe) [](Oe)(..) }')

4050 format(i5,' { V(V) O(Oa,2) O(Oe,1.5) [](Oe,0.5) } --> { M(V)('

+,i2,''') O(Oa,2) O(Oe,1.5) O(Oe,0.5)(") O(Ois,',f4.1,

+')(") } + ',i5,' { V(V) O(Oa,2) O(Oe) [](Oe)(.) }')

c**** Schemes 10a-c

fac1= (2.0*icn-5-l)/2.0

fac2= (2.0*icn-7-l)/2.0

fac3=(icn-6)

fac4=(6-icn)

ifac5=(2.0*icn-5-l)

ifac6=(2.0*icn-6-l)

imef=5-l

if(imef.ge.0) then

sum1=-1.0*(imef+2.0*(icn-6))

sum2=2.0*fac2

sum3=-1.0*(imef+2.0*(icn-6)+2)

sum4=2.0*fac1

sum5=-1.0*(imef+1+2.0*(icn-6))

sum6=ifac6

endif

if(imef.lt.0) then

sum1=-1.0*(2.0*(icn-6))

sum2=2.0*fac2+(-1.0*imef)

sum3=-1.0*(2.0*(icn-6)+2)

sum4=2.0*fac1+(-1.0*imef)

sum5=-1.0*(1+2.0*(icn-6))

sum6=ifac6+(-1.0*imef)

endif

write(6,6000) icn,l

write(6,150) '10a'

write(6,2060) fac1,imef,fac3,fac2

write(6,180) sum1,sum2,sum1+sum2

write(6,250) '10b'

write(6,3060) fac1,imef,fac3,fac1

write(6,180) sum3,sum4,sum3+sum4

write(6,350) '10c'

write(6,4060) ifac5,imef,fac3,ifac6

write(6,180) sum5,sum6,sum5+sum6

6000 format(//' EV model unshared interstitials CN =',i2,' l = ',i2)

2060 format(f4.1,' { V(V) O(Oa,2) O(Oe,2) } --> { M(V)(',i2,''')'

+' O(Oa,2) O(Oe,2) O(Oiu,',f4.1,')(") } + ',f4.1,

+' { V(V) O(Oa,2) O(Oe) [](Oe)(..) }')

3060 format(' { V(V) O(Oa,2) O(Oe) [](Oe) } + ',f4.1,

+'{ V(V) O(Oa,2) O(Oe,2) } --> { M(V)(',i2,''')'

+' O(Oa,2) O(Oe) O(Oe)(") O(Oiu,',f4.1,')(") } + ',f4.1,

+' { V(V) O(Oa,2) O(Oe) [](Oe)(..) }')

4060 format(i4,' { V(V) O(Oa,2) O(Oe,1.5) [](Oe,0.5) } --> { M(V)('

+,i2,''') O(Oa,2) O(Oe,1.5) O(Oe,0.5)(") O(Oiu,',f4.1,

+')(") } + ',i4,' { V(V) O(Oa,2) O(Oe) [](Oe)(.) }')

c**** Schemes 11a-c

fac1= (icn+3-l)/4.0

fac2= (icn-1-l)/4.0

fac3=(icn-6)/2.0

fac4=(6-icn)/2.0

fac5=(icn+3-l)/3.0

fac6=(icn-l)/3.0

imef=5-l

if(imef.ge.0) then

sum1=-1.0*(imef+(icn-6))

sum2=4.0*fac2

sum3=-1.0*(imef+(icn-6)+4)

sum4=4.0*fac1

sum5=-1.0*(imef+1+(icn-6))

sum6=fac6*3.0

endif

if(imef.lt.0) then

sum1=-1.0*((icn-6))

sum2=4.0*fac2+(-1.0*imef)

sum3=-1.0*((icn-6)+4)

sum4=4.0*fac1+(-1.0*imef)

sum5=-1.0*(1+(icn-6))

sum6=fac6*3.0+(-1.0*imef)

endif

write(6,7000) icn,l

write(6,150) '11a'

if((icn-1-l).ne.0) write(6,2070) fac1,imef,fac3,fac2

if((icn-1-l).eq.0) write(6,2071) fac1,imef,fac3

write(6,180) sum1,sum2,sum1+sum2

write(6,250) '11b'

write(6,3070) fac1,imef,fac3,fac1

write(6,180) sum3,sum4,sum3+sum4

write(6,350) '11c'

write(6,4070) fac5,imef,fac3,fac6

write(6,180) sum5,sum6,sum5+sum6

7000 format(//' AV model shared interstitials CN =',i2,' l = ',i2)

2070 format(f6.3,' { V(V) O(Oa,2) O(Oe,2) } --> { M(V)(',i2,''')'

+' O(Oa,2) O(Oe,2) O(Ois,',f4.1,')(") } + ',f6.3,

+' { V(V) [](Oa,2)(..) O(Oe,2) }')

2071 format(f6.3,' { V(V) O(Oa,2) O(Oe,2) } --> { M(V)(',i2,''')'

+' O(Oa,2) O(Oe,2) O(Ois,',f4.1,')(") } ')

3070 format(' { V(V) [](Oa,2) O(Oe,2) } + ',f6.3,

+'{ V(V) O(Oa,2) O(Oe,2) } --> { M(V)(',i2,''')'

+' O(Oa,2)(") O(Oe,2) O(Ois,',f4.1,')(") } + ',f6.3,

+' { V(V) [](Oa,2)(..) O(Oe,2) }')

4070 format(f6.3,' { V(V) O(Oa,1.5) [](Oa,0.5) O(Oe,2) } --> { M(V)('

+,i2,''') O(Oa,2)(0.5',''') O(Oe,2) O(Ois,',f4.1,

+')(") } + ',f6.3,' { V(V) [](Oa,2)(1.5 .) O(Oe,2) }')

c**** Schemes 12a-c

fac1= (2.0*icn-3-l)/4.0

fac2= (2.0*icn-7-l)/4.0

fac3=(icn-6)

fac4=(6-icn)

fac5=(2.0*icn-l-3)/3.0

fac6=(2.0*icn-l-6)/3.0

imef=5-l

if(imef.ge.0) then

sum1=-1.0*(imef+2.0*(icn-6))

sum2=4.0*fac2

sum3=-1.0*(imef+2.0*(icn-6)+4)

sum4=4.0*fac1

sum5=-1.0*(imef+1+2.0*(icn-6))

sum6=fac6*3.0

endif

if(imef.lt.0) then

sum1=-1.0*(2.0*(icn-6))

sum2=4.0*fac2+(-1.0*imef)

sum3=-1.0*(2.0*(icn-6)+4)

sum4=4.0*fac1+(-1.0*imef)

sum5=-1.0*(1+2.0*(icn-6))

sum6=fac6*3.0+(-1.0*imef)

endif

write(6,8000) icn,l

write(6,150) '12a'

write(6,2080) fac1,imef,fac3,fac2

write(6,180) sum1,sum2,sum1+sum2

write(6,250) '12b'

write(6,3080) fac1,imef,fac3,fac1

write(6,180) sum3,sum4,sum3+sum4

write(6,350) '12c'

write(6,4080) fac5,imef,fac3,fac6

write(6,180) sum5,sum6,sum5+sum6

8000 format(//' AV model unshared interstitials CN =',i2,' l = ',i2)

2080 format(f6.3,' { V(V) O(Oa,2) O(Oe,2) } --> { M(V)(',i2,''')'

+' O(Oa,2) O(Oe,2) O(Oiu,',f4.1,')(") } + ',f6.3,

+' { V(V) [](Oa,2)(..) O(Oe,2) }')

3080 format(' { V(V) [](Oa,2) O(Oe,2) } + ',f6.3,

+'{ V(V) O(Oa,2) O(Oe,2) } --> { M(V)(',i2,''')'

+' O(Oa,2)(") O(Oe,2) O(Oiu,',f4.1,')(") } + ',f6.3,

+' { V(V) [](Oa,2)(..) O(Oe,2) }')

4080 format(f6.3,' { V(V) O(Oa,1.5) [](Oa,0.5) O(Oe,2) } --> { M(V)('

+,i2,''') O(Oa,2)(0.5',''') O(Oe,2) O(Oiu,',f4.1,

+')(") } + ',f6.3,' { V(V) [](Oa,2)(1.5 .) O(Oe,2) }')

40 continue

30 continue

end

**(4) DEFEQN.OUT Output from program DEFEQN**

EV model CN = 4 l = 1

Substitution for vanadium octahedron. Scheme 3a

2.0 { V(V) O(Oa,2) O(Oe,2) } --> { M(V)( 4') O(Oa,2) O(Oe, 1.0) [](Oe, 1.0)(..) } + 1.0 { V(V) O(Oa,2) O(Oe) [](Oe)(..) }

Total effective -ve charge = -4.00 Total effective +ve charge = 4.00 Overall = 0.00

Substitution for vanadium tetrahedron. Scheme 3b

{ V(V) O(Oa,2) O(Oe) [](Oe) } + 2.0 { V(V) O(Oa,2) O(Oe,2) } --> { M(V)( 4') O(Oa,2) O(Oe) [](Oe, 1.0) } + 2.0 { V(V) O(Oa,2) O(Oe) [](Oe)(..) }

Total effective -ve charge = -4.00 Total effective +ve charge = 4.00 Overall = 0.00

Substitution for average vanadium polyhedron. Scheme 3c

4.0 { V(V) O(Oa,2) O(Oe,1.5) [](Oe,0.5) } --> { M(V)( 4') O(Oa,2) O(Oe) [](Oe, 1.0)( 1 .) } + 3.0 { V(V) O(Oa,2) O(Oe) [](Oe)(.) }

Total effective -ve charge = -4.00 Total effective +ve charge = 4.00 Overall = 0.00

AV model CN = 4 l = 1

Substitution for vanadium octahedron. Scheme 8a

{ V(V) O(Oa,2) O(Oe,2) } --> { M(V)( 4') [](Oa, 2.0)(..) O(Oe,2) }

Total effective -ve charge = -4.00 Total effective +ve charge = 4.00 Overall = 0.00

Substitution for vanadium tetrahedron. Scheme 6b

{ V(V) [](Oa,2) O(Oe,2) } + 1.000 { V(V) O(Oa,2) O(Oe,2) } --> { M(V)( 4') [](Oa, 2.0) O(Oe,2) } + 1.000 { V(V) [](Oa,2)(..) O(Oe,2) }

Total effective -ve charge = -4.00 Total effective +ve charge = 4.00 Overall = 0.00

Substitution for average vanadium polyhedron. Scheme 6c

1.333 { V(V) O(Oa,1.5) [](Oa,0.5) O(Oe,2) } --> { M(V)( 4') [](Oa, 2.0)( 1.5 .) O(Oe,2) } + 0.333 { V(V) [](Oa,2)(1.5 .) O(Oe,2) }

Total effective -ve charge = -4.00 Total effective +ve charge = 4.00 Overall = 0.00

EV model CN = 4 l = 2

Substitution for vanadium octahedron. Scheme 3a

1.5 { V(V) O(Oa,2) O(Oe,2) } --> { M(V)( 3') O(Oa,2) O(Oe, 1.0) [](Oe, 1.0)(..) } + 0.5 { V(V) O(Oa,2) O(Oe) [](Oe)(..) }

Total effective -ve charge = -3.00 Total effective +ve charge = 3.00 Overall = 0.00

Substitution for vanadium tetrahedron. Scheme 3b

{ V(V) O(Oa,2) O(Oe) [](Oe) } + 1.5 { V(V) O(Oa,2) O(Oe,2) } --> { M(V)( 3') O(Oa,2) O(Oe) [](Oe, 1.0) } + 1.5 { V(V) O(Oa,2) O(Oe) [](Oe)(..) }

Total effective -ve charge = -3.00 Total effective +ve charge = 3.00 Overall = 0.00

Substitution for average vanadium polyhedron. Scheme 3c

3.0 { V(V) O(Oa,2) O(Oe,1.5) [](Oe,0.5) } --> { M(V)( 3') O(Oa,2) O(Oe) [](Oe, 1.0)( 1 .) } + 2.0 { V(V) O(Oa,2) O(Oe) [](Oe)(.) }

Total effective -ve charge = -3.00 Total effective +ve charge = 3.00 Overall = 0.00

AV model CN = 4 l = 2

Substitution for vanadium octahedron. Scheme 7a

{ V(V) O(Oa,2) O(Oe,2) } + 0.250 { V(V) [](Oa,2) O(Oe,2) } --> { M(V)( 3') [](Oa, 2.0)(..) O(Oe,2) } + 0.250 { V(V) O(Oa,2)(") O(Oe,2) }

Total effective -ve charge = -4.00 Total effective +ve charge = 4.00 Overall = 0.00

Substitution for vanadium tetrahedron. Scheme 6b

{ V(V) [](Oa,2) O(Oe,2) } + 0.750 { V(V) O(Oa,2) O(Oe,2) } --> { M(V)( 3') [](Oa, 2.0) O(Oe,2) } + 0.750 { V(V) [](Oa,2)(..) O(Oe,2) }

Total effective -ve charge = -3.00 Total effective +ve charge = 3.00 Overall = 0.00

Substitution for average vanadium polyhedron. Scheme 8c

{ V(V) O(Oa,1.5) [](Oa,0.5) O(Oe,2) } --> { M(V)( 3') [](Oa, 2.0)( 1.5 .) O(Oe,2) }

Total effective -ve charge = -3.00 Total effective +ve charge = 3.00 Overall = 0.00

EV model CN = 4 l = 3

Substitution for vanadium octahedron. Scheme 5a

{ V(V) O(Oa,2) O(Oe,2) } --> { M(V)( 2') O(Oa,2) [](Oe, 1.0)(..) }

Total effective -ve charge = -2.00 Total effective +ve charge = 2.00 Overall = 0.00

Substitution for vanadium tetrahedron. Scheme 3b

{ V(V) O(Oa,2) O(Oe) [](Oe) } + 1.0 { V(V) O(Oa,2) O(Oe,2) } --> { M(V)( 2') O(Oa,2) O(Oe) [](Oe, 1.0) } + 1.0 { V(V) O(Oa,2) O(Oe) [](Oe)(..) }

Total effective -ve charge = -2.00 Total effective +ve charge = 2.00 Overall = 0.00

Substitution for average vanadium polyhedron. Scheme 3c

2.0 { V(V) O(Oa,2) O(Oe,1.5) [](Oe,0.5) } --> { M(V)( 2') O(Oa,2) O(Oe) [](Oe, 1.0)( 1 .) } + 1.0 { V(V) O(Oa,2) O(Oe) [](Oe)(.) }

Total effective -ve charge = -2.00 Total effective +ve charge = 2.00 Overall = 0.00

AV model CN = 4 l = 3

Substitution for vanadium octahedron. Scheme 7a

{ V(V) O(Oa,2) O(Oe,2) } + 0.500 { V(V) [](Oa,2) O(Oe,2) } --> { M(V)( 2') [](Oa, 2.0)(..) O(Oe,2) } + 0.500 { V(V) O(Oa,2)(") O(Oe,2) }

Total effective -ve charge = -4.00 Total effective +ve charge = 4.00 Overall = 0.00

Substitution for vanadium tetrahedron. Scheme 6b

{ V(V) [](Oa,2) O(Oe,2) } + 0.500 { V(V) O(Oa,2) O(Oe,2) } --> { M(V)( 2') [](Oa, 2.0) O(Oe,2) } + 0.500 { V(V) [](Oa,2)(..) O(Oe,2) }

Total effective -ve charge = -2.00 Total effective +ve charge = 2.00 Overall = 0.00

Substitution for average vanadium polyhedron. Scheme 7c

2.000 { V(V) O(Oa,1.5) [](Oa,0.5) O(Oe,2) } --> { M(V)( 2') [](Oa, 2.0)( 1.5 .) O(Oe,2) } + 1.000 { V(V) O(Oa,2)(0.5') O(Oe,2) }

Total effective -ve charge = -3.00 Total effective +ve charge = 3.00 Overall = 0.00

EV model CN = 4 l = 4

Substitution for vanadium octahedron. Scheme 4a

{ V(V) O(Oa,2) O(Oe,2) } + 0.5 { V(V) O(Oa,2) O(Oe) [](Oe) } --> { M(V)( 1') O(Oa,2) O(Oe, 1.0) [](Oe, 1.0)(..) } + 0.5 { V(V) O(Oa,2) O(Oe) O(Oe)(") }

Total effective -ve charge = -2.00 Total effective +ve charge = 2.00 Overall = 0.00

Substitution for vanadium tetrahedron. Scheme 3b

{ V(V) O(Oa,2) O(Oe) [](Oe) } + 0.5 { V(V) O(Oa,2) O(Oe,2) } --> { M(V)( 1') O(Oa,2) O(Oe) [](Oe, 1.0) } + 0.5 { V(V) O(Oa,2) O(Oe) [](Oe)(..) }

Total effective -ve charge = -1.00 Total effective +ve charge = 1.00 Overall = 0.00

Substitution for average vanadium polyhedron. Scheme 5c

{ V(V) O(Oa,2) O(Oe,1.5) [](Oe,0.5) } --> { M(V)( 1') O(Oa,2) O(Oe) [](Oe, 1.0)( 1 .) }

Total effective -ve charge = -1.00 Total effective +ve charge = 1.00 Overall = 0.00

AV model CN = 4 l = 4

Substitution for vanadium octahedron. Scheme 7a

{ V(V) O(Oa,2) O(Oe,2) } + 0.750 { V(V) [](Oa,2) O(Oe,2) } --> { M(V)( 1') [](Oa, 2.0)(..) O(Oe,2) } + 0.750 { V(V) O(Oa,2)(") O(Oe,2) }

Total effective -ve charge = -4.00 Total effective +ve charge = 4.00 Overall = 0.00

Substitution for vanadium tetrahedron. Scheme 6b

{ V(V) [](Oa,2) O(Oe,2) } + 0.250 { V(V) O(Oa,2) O(Oe,2) } --> { M(V)( 1') [](Oa, 2.0) O(Oe,2) } + 0.250 { V(V) [](Oa,2)(..) O(Oe,2) }

Total effective -ve charge = -1.00 Total effective +ve charge = 1.00 Overall = 0.00

Substitution for average vanadium polyhedron. Scheme 7c

3.000 { V(V) O(Oa,1.5) [](Oa,0.5) O(Oe,2) } --> { M(V)( 1') [](Oa, 2.0)( 1.5 .) O(Oe,2) } + 2.000 { V(V) O(Oa,2)(0.5') O(Oe,2) }

Total effective -ve charge = -3.00 Total effective +ve charge = 3.00 Overall = 0.00

EV model CN = 4 l = 5

Substitution for vanadium octahedron. Scheme 4a

{ V(V) O(Oa,2) O(Oe,2) } + 1.0 { V(V) O(Oa,2) O(Oe) [](Oe) } --> { M(V)( 0') O(Oa,2) O(Oe, 1.0) [](Oe, 1.0)(..) } + 1.0 { V(V) O(Oa,2) O(Oe) O(Oe)(") }

Total effective -ve charge = -2.00 Total effective +ve charge = 2.00 Overall = 0.00

Substitution for vanadium tetrahedron. Scheme 5b

{ V(V) O(Oa,2) O(Oe) [](Oe) } --> { M(V)( 0') O(Oa,2) O(Oe) [](Oe, 1.0) }

Total effective -ve charge = 0.00 Total effective +ve charge = 0.00 Overall = 0.00

Substitution for average vanadium polyhedron. Scheme 4c

2.0 { V(V) O(Oa,2) O(Oe,1.5) [](Oe,0.5) } --> { M(V)( 0') O(Oa,2) O(Oe) [](Oe, 1.0)( 1 .) } + 1.0 { V(V) O(Oa,2) O(Oe) O(Oe)' }

Total effective -ve charge = -1.00 Total effective +ve charge = 1.00 Overall = 0.00

AV model CN = 4 l = 5

Substitution for vanadium octahedron. Scheme 7a

{ V(V) O(Oa,2) O(Oe,2) } + 1.000 { V(V) [](Oa,2) O(Oe,2) } --> { M(V)( 0') [](Oa, 2.0)(..) O(Oe,2) } + 1.000 { V(V) O(Oa,2)(") O(Oe,2) }

Total effective -ve charge = -4.00 Total effective +ve charge = 4.00 Overall = 0.00

Substitution for vanadium tetrahedron. Scheme 8b

{ V(V) [](Oa,2) O(Oe,2) } --> { M(V)( 0') [](Oa, 2.0) O(Oe,2) }

Total effective -ve charge = 0.00 Total effective +ve charge = 0.00 Overall = 0.00

Substitution for average vanadium polyhedron. Scheme 7c

4.000 { V(V) O(Oa,1.5) [](Oa,0.5) O(Oe,2) } --> { M(V)( 0') [](Oa, 2.0)( 1.5 .) O(Oe,2) } + 3.000 { V(V) O(Oa,2)(0.5') O(Oe,2) }

Total effective -ve charge = -3.00 Total effective +ve charge = 3.00 Overall = 0.00

EV model CN = 4 l = 6

Substitution for vanadium octahedron. Scheme 4a

{ V(V) O(Oa,2) O(Oe,2) } + 1.5 { V(V) O(Oa,2) O(Oe) [](Oe) } --> { M(V)(-1') O(Oa,2) O(Oe, 1.0) [](Oe, 1.0)(..) } + 1.5 { V(V) O(Oa,2) O(Oe) O(Oe)(") }

Total effective -ve charge = -3.00 Total effective +ve charge = 3.00 Overall = 0.00

Substitution for vanadium tetrahedron. Scheme 4b

1.5 { V(V) O(Oa,2) O(Oe) [](Oe) } --> { M(V)(-1') O(Oa,2) O(Oe) [](Oe, 1.0) } + 0.5 { V(V) O(Oa,2) O(Oe) O(Oe)" }

Total effective -ve charge = -1.00 Total effective +ve charge = 1.00 Overall = 0.00

Substitution for average vanadium polyhedron. Scheme 4c

3.0 { V(V) O(Oa,2) O(Oe,1.5) [](Oe,0.5) } --> { M(V)(-1') O(Oa,2) O(Oe) [](Oe, 1.0)( 1 .) } + 2.0 { V(V) O(Oa,2) O(Oe) O(Oe)' }

Total effective -ve charge = -2.00 Total effective +ve charge = 2.00 Overall = 0.00

AV model CN = 4 l = 6

Substitution for vanadium octahedron. Scheme 7a

{ V(V) O(Oa,2) O(Oe,2) } + 1.250 { V(V) [](Oa,2) O(Oe,2) } --> { M(V)(-1') [](Oa, 2.0)(..) O(Oe,2) } + 1.250 { V(V) O(Oa,2)(") O(Oe,2) }

Total effective -ve charge = -5.00 Total effective +ve charge = 5.00 Overall = 0.00

Substitution for vanadium tetrahedron. Scheme 7b

1.250 { V(V) [](Oa,2) O(Oe,2) } --> { M(V)(-1') [](Oa, 2.0) O(Oe,2) } + 0.250 { V(V) O(Oa,2)(") O(Oe,2) }

Total effective -ve charge = -1.00 Total effective +ve charge = 1.00 Overall = 0.00

Substitution for average vanadium polyhedron. Scheme 7c

5.000 { V(V) O(Oa,1.5) [](Oa,0.5) O(Oe,2) } --> { M(V)(-1') [](Oa, 2.0)( 1.5 .) O(Oe,2) } + 4.000 { V(V) O(Oa,2)(0.5') O(Oe,2) }

Total effective -ve charge = -4.00 Total effective +ve charge = 4.00 Overall = 0.00

EV model CN = 5 l = 1

Substitution for vanadium octahedron. Scheme 3a

2.5 { V(V) O(Oa,2) O(Oe,2) } --> { M(V)( 4') O(Oa,2) O(Oe, 1.5) [](Oe, 0.5)(..) } + 1.5 { V(V) O(Oa,2) O(Oe) [](Oe)(..) }

Total effective -ve charge = -4.00 Total effective +ve charge = 4.00 Overall = 0.00

Substitution for vanadium tetrahedron. Scheme 3b

{ V(V) O(Oa,2) O(Oe) [](Oe) } + 2.5 { V(V) O(Oa,2) O(Oe,2) } --> { M(V)( 4') O(Oa,2) O(Oe) O(Oe, 0.5)" [](Oe, 0.5) } + 2.5 { V(V) O(Oa,2) O(Oe) [](Oe)(..) }

Total effective -ve charge = -5.00 Total effective +ve charge = 5.00 Overall = 0.00

Substitution for average vanadium polyhedron. Scheme 3c

5.0 { V(V) O(Oa,2) O(Oe,1.5) [](Oe,0.5) } --> { M(V)( 4') O(Oa,2) O(Oe) O(Oe, 0.5)( 0') [](Oe, 0.5)( 0 .) } + 4.0 { V(V) O(Oa,2) O(Oe) [](Oe)(.) }

Total effective -ve charge = -4.00 Total effective +ve charge = 4.00 Overall = 0.00

AV model CN = 5 l = 1

Substitution for vanadium octahedron. Scheme 6a

1.500 { V(V) O(Oa,2) O(Oe,2) } --> { M(V)( 4') O(Oa, 1.0) [](Oa, 1.0)(..) O(Oe,2) } + 0.500 { V(V) [](Oa,2)(..) O(Oe,2) }

Total effective -ve charge = -4.00 Total effective +ve charge = 4.00 Overall = 0.00

Substitution for vanadium tetrahedron. Scheme 6b

{ V(V) [](Oa,2) O(Oe,2) } + 1.500 { V(V) O(Oa,2) O(Oe,2) } --> { M(V)( 4') O(Oa, 1.0)(") [](Oa, 1.0) O(Oe,2) } + 1.500 { V(V) [](Oa,2)(..) O(Oe,2) }

Total effective -ve charge = -6.00 Total effective +ve charge = 6.00 Overall = 0.00

Substitution for average vanadium polyhedron. Scheme 6c

2.000 { V(V) O(Oa,1.5) [](Oa,0.5) O(Oe,2) } --> { M(V)( 4') O(Oa, 1.0)( 0.0') [](Oa, 1.0)( 1.0 .) O(Oe,2) } + 1.000 { V(V) [](Oa,2)(1.5 .) O(Oe,2) }

Total effective -ve charge = -4.00 Total effective +ve charge = 4.00 Overall = 0.00

EV model CN = 5 l = 2

Substitution for vanadium octahedron. Scheme 3a

2.0 { V(V) O(Oa,2) O(Oe,2) } --> { M(V)( 3') O(Oa,2) O(Oe, 1.5) [](Oe, 0.5)(..) } + 1.0 { V(V) O(Oa,2) O(Oe) [](Oe)(..) }

Total effective -ve charge = -3.00 Total effective +ve charge = 3.00 Overall = 0.00

Substitution for vanadium tetrahedron. Scheme 3b

{ V(V) O(Oa,2) O(Oe) [](Oe) } + 2.0 { V(V) O(Oa,2) O(Oe,2) } --> { M(V)( 3') O(Oa,2) O(Oe) O(Oe, 0.5)" [](Oe, 0.5) } + 2.0 { V(V) O(Oa,2) O(Oe) [](Oe)(..) }

Total effective -ve charge = -4.00 Total effective +ve charge = 4.00 Overall = 0.00

Substitution for average vanadium polyhedron. Scheme 3c

4.0 { V(V) O(Oa,2) O(Oe,1.5) [](Oe,0.5) } --> { M(V)( 3') O(Oa,2) O(Oe) O(Oe, 0.5)( 0') [](Oe, 0.5)( 0 .) } + 3.0 { V(V) O(Oa,2) O(Oe) [](Oe)(.) }

Total effective -ve charge = -3.00 Total effective +ve charge = 3.00 Overall = 0.00

AV model CN = 5 l = 2

Substitution for vanadium octahedron. Scheme 6a

1.250 { V(V) O(Oa,2) O(Oe,2) } --> { M(V)( 3') O(Oa, 1.0) [](Oa, 1.0)(..) O(Oe,2) } + 0.250 { V(V) [](Oa,2)(..) O(Oe,2) }

Total effective -ve charge = -3.00 Total effective +ve charge = 3.00 Overall = 0.00

Substitution for vanadium tetrahedron. Scheme 6b

{ V(V) [](Oa,2) O(Oe,2) } + 1.250 { V(V) O(Oa,2) O(Oe,2) } --> { M(V)( 3') O(Oa, 1.0)(") [](Oa, 1.0) O(Oe,2) } + 1.250 { V(V) [](Oa,2)(..) O(Oe,2) }

Total effective -ve charge = -5.00 Total effective +ve charge = 5.00 Overall = 0.00

Substitution for average vanadium polyhedron. Scheme 6c

1.667 { V(V) O(Oa,1.5) [](Oa,0.5) O(Oe,2) } --> { M(V)( 3') O(Oa, 1.0)( 0.0') [](Oa, 1.0)( 1.0 .) O(Oe,2) } + 0.667 { V(V) [](Oa,2)(1.5 .) O(Oe,2) }

Total effective -ve charge = -3.00 Total effective +ve charge = 3.00 Overall = 0.00

EV model CN = 5 l = 3

Substitution for vanadium octahedron. Scheme 3a

1.5 { V(V) O(Oa,2) O(Oe,2) } --> { M(V)( 2') O(Oa,2) O(Oe, 1.5) [](Oe, 0.5)(..) } + 0.5 { V(V) O(Oa,2) O(Oe) [](Oe)(..) }

Total effective -ve charge = -2.00 Total effective +ve charge = 2.00 Overall = 0.00

Substitution for vanadium tetrahedron. Scheme 3b

{ V(V) O(Oa,2) O(Oe) [](Oe) } + 1.5 { V(V) O(Oa,2) O(Oe,2) } --> { M(V)( 2') O(Oa,2) O(Oe) O(Oe, 0.5)" [](Oe, 0.5) } + 1.5 { V(V) O(Oa,2) O(Oe) [](Oe)(..) }

Total effective -ve charge = -3.00 Total effective +ve charge = 3.00 Overall = 0.00

Substitution for average vanadium polyhedron. Scheme 3c

3.0 { V(V) O(Oa,2) O(Oe,1.5) [](Oe,0.5) } --> { M(V)( 2') O(Oa,2) O(Oe) O(Oe, 0.5)( 0') [](Oe, 0.5)( 0 .) } + 2.0 { V(V) O(Oa,2) O(Oe) [](Oe)(.) }

Total effective -ve charge = -2.00 Total effective +ve charge = 2.00 Overall = 0.00

AV model CN = 5 l = 3

Substitution for vanadium octahedron. Scheme 8a

{ V(V) O(Oa,2) O(Oe,2) } --> { M(V)( 2') O(Oa, 1.0) [](Oa, 1.0)(..) O(Oe,2) }

Total effective -ve charge = -2.00 Total effective +ve charge = 2.00 Overall = 0.00

Substitution for vanadium tetrahedron. Scheme 6b

{ V(V) [](Oa,2) O(Oe,2) } + 1.000 { V(V) O(Oa,2) O(Oe,2) } --> { M(V)( 2') O(Oa, 1.0)(") [](Oa, 1.0) O(Oe,2) } + 1.000 { V(V) [](Oa,2)(..) O(Oe,2) }

Total effective -ve charge = -4.00 Total effective +ve charge = 4.00 Overall = 0.00

Substitution for average vanadium polyhedron. Scheme 6c

1.333 { V(V) O(Oa,1.5) [](Oa,0.5) O(Oe,2) } --> { M(V)( 2') O(Oa, 1.0)( 0.0') [](Oa, 1.0)( 1.0 .) O(Oe,2) } + 0.333 { V(V) [](Oa,2)(1.5 .) O(Oe,2) }

Total effective -ve charge = -2.00 Total effective +ve charge = 2.00 Overall = 0.00

EV model CN = 5 l = 4

Substitution for vanadium octahedron. Scheme 5a

{ V(V) O(Oa,2) O(Oe,2) } --> { M(V)( 1') O(Oa,2) O(Oe, 1.5) [](Oe, 0.5)(..) }

Total effective -ve charge = -1.00 Total effective +ve charge = 1.00 Overall = 0.00

Substitution for vanadium tetrahedron. Scheme 3b

{ V(V) O(Oa,2) O(Oe) [](Oe) } + 1.0 { V(V) O(Oa,2) O(Oe,2) } --> { M(V)( 1') O(Oa,2) O(Oe) O(Oe, 0.5)" [](Oe, 0.5) } + 1.0 { V(V) O(Oa,2) O(Oe) [](Oe)(..) }

Total effective -ve charge = -2.00 Total effective +ve charge = 2.00 Overall = 0.00

Substitution for average vanadium polyhedron. Scheme 3c

2.0 { V(V) O(Oa,2) O(Oe,1.5) [](Oe,0.5) } --> { M(V)( 1') O(Oa,2) O(Oe) O(Oe, 0.5)( 0') [](Oe, 0.5)( 0 .) } + 1.0 { V(V) O(Oa,2) O(Oe) [](Oe)(.) }

Total effective -ve charge = -1.00 Total effective +ve charge = 1.00 Overall = 0.00

AV model CN = 5 l = 4

Substitution for vanadium octahedron. Scheme 7a

{ V(V) O(Oa,2) O(Oe,2) } + 0.250 { V(V) [](Oa,2) O(Oe,2) } --> { M(V)( 1') O(Oa, 1.0) [](Oa, 1.0)(..) O(Oe,2) } + 0.250 { V(V) O(Oa,2)(") O(Oe,2) }

Total effective -ve charge = -2.00 Total effective +ve charge = 2.00 Overall = 0.00

Substitution for vanadium tetrahedron. Scheme 6b

{ V(V) [](Oa,2) O(Oe,2) } + 0.750 { V(V) O(Oa,2) O(Oe,2) } --> { M(V)( 1') O(Oa, 1.0)(") [](Oa, 1.0) O(Oe,2) } + 0.750 { V(V) [](Oa,2)(..) O(Oe,2) }

Total effective -ve charge = -3.00 Total effective +ve charge = 3.00 Overall = 0.00

Substitution for average vanadium polyhedron. Scheme 8c

{ V(V) O(Oa,1.5) [](Oa,0.5) O(Oe,2) } --> { M(V)( 1') O(Oa, 1.0)( 0.0') [](Oa, 1.0)( 1.0 .) O(Oe,2) }

Total effective -ve charge = -1.00 Total effective +ve charge = 1.00 Overall = 0.00

EV model CN = 5 l = 5

Substitution for vanadium octahedron. Scheme 4a

{ V(V) O(Oa,2) O(Oe,2) } + 0.5 { V(V) O(Oa,2) O(Oe) [](Oe) } --> { M(V)( 0') O(Oa,2) O(Oe, 1.5) [](Oe, 0.5)(..) } + 0.5 { V(V) O(Oa,2) O(Oe) O(Oe)(") }

Total effective -ve charge = -1.00 Total effective +ve charge = 1.00 Overall = 0.00

Substitution for vanadium tetrahedron. Scheme 3b

{ V(V) O(Oa,2) O(Oe) [](Oe) } + 0.5 { V(V) O(Oa,2) O(Oe,2) } --> { M(V)( 0') O(Oa,2) O(Oe) O(Oe, 0.5)" [](Oe, 0.5) } + 0.5 { V(V) O(Oa,2) O(Oe) [](Oe)(..) }

Total effective -ve charge = -1.00 Total effective +ve charge = 1.00 Overall = 0.00

Substitution for average vanadium polyhedron. Scheme 5c

{ V(V) O(Oa,2) O(Oe,1.5) [](Oe,0.5) } --> { M(V)( 0') O(Oa,2) O(Oe) O(Oe, 0.5)( 0') [](Oe, 0.5)( 0 .) }

Total effective -ve charge = 0.00 Total effective +ve charge = 0.00 Overall = 0.00

AV model CN = 5 l = 5

Substitution for vanadium octahedron. Scheme 7a

{ V(V) O(Oa,2) O(Oe,2) } + 0.500 { V(V) [](Oa,2) O(Oe,2) } --> { M(V)( 0') O(Oa, 1.0) [](Oa, 1.0)(..) O(Oe,2) } + 0.500 { V(V) O(Oa,2)(") O(Oe,2) }

Total effective -ve charge = -2.00 Total effective +ve charge = 2.00 Overall = 0.00

Substitution for vanadium tetrahedron. Scheme 6b

{ V(V) [](Oa,2) O(Oe,2) } + 0.500 { V(V) O(Oa,2) O(Oe,2) } --> { M(V)( 0') O(Oa, 1.0)(") [](Oa, 1.0) O(Oe,2) } + 0.500 { V(V) [](Oa,2)(..) O(Oe,2) }

Total effective -ve charge = -2.00 Total effective +ve charge = 2.00 Overall = 0.00

Substitution for average vanadium polyhedron. Scheme 7c

2.000 { V(V) O(Oa,1.5) [](Oa,0.5) O(Oe,2) } --> { M(V)( 0') O(Oa, 1.0)( 0.0') [](Oa, 1.0)( 1.0 .) O(Oe,2) } + 1.000 { V(V) O(Oa,2)(0.5') O(Oe,2) }

Total effective -ve charge = -1.00 Total effective +ve charge = 1.00 Overall = 0.00

EV model CN = 5 l = 6

Substitution for vanadium octahedron. Scheme 4a

{ V(V) O(Oa,2) O(Oe,2) } + 1.0 { V(V) O(Oa,2) O(Oe) [](Oe) } --> { M(V)(-1') O(Oa,2) O(Oe, 1.5) [](Oe, 0.5)(..) } + 1.0 { V(V) O(Oa,2) O(Oe) O(Oe)(") }

Total effective -ve charge = -2.00 Total effective +ve charge = 2.00 Overall = 0.00

Substitution for vanadium tetrahedron. Scheme 5b

{ V(V) O(Oa,2) O(Oe) [](Oe) } --> { M(V)(-1') O(Oa,2) O(Oe) O(Oe, 0.5)" [](Oe, 0.5) }

Total effective -ve charge = -1.00 Total effective +ve charge = 1.00 Overall = 0.00

Substitution for average vanadium polyhedron. Scheme 4c

2.0 { V(V) O(Oa,2) O(Oe,1.5) [](Oe,0.5) } --> { M(V)(-1') O(Oa,2) O(Oe) O(Oe, 0.5)( 0)' [](Oe, 0.5)( 0 .) } + 1.0 { V(V) O(Oa,2) O(Oe) O(Oe)' }

Total effective -ve charge = -1.00 Total effective +ve charge = 1.00 Overall = 0.00

AV model CN = 5 l = 6

Substitution for vanadium octahedron. Scheme 7a

{ V(V) O(Oa,2) O(Oe,2) } + 0.750 { V(V) [](Oa,2) O(Oe,2) } --> { M(V)(-1') O(Oa, 1.0) [](Oa, 1.0)(..) O(Oe,2) } + 0.750 { V(V) O(Oa,2)(") O(Oe,2) }

Total effective -ve charge = -3.00 Total effective +ve charge = 3.00 Overall = 0.00

Substitution for vanadium tetrahedron. Scheme 6b

{ V(V) [](Oa,2) O(Oe,2) } + 0.250 { V(V) O(Oa,2) O(Oe,2) } --> { M(V)(-1') O(Oa, 1.0)(") [](Oa, 1.0) O(Oe,2) } + 0.250 { V(V) [](Oa,2)(..) O(Oe,2) }

Total effective -ve charge = -2.00 Total effective +ve charge = 2.00 Overall = 0.00

Substitution for average vanadium polyhedron. Scheme 7c

3.000 { V(V) O(Oa,1.5) [](Oa,0.5) O(Oe,2) } --> { M(V)(-1') O(Oa, 1.0)( 0.0') [](Oa, 1.0)( 1.0 .) O(Oe,2) } + 2.000 { V(V) O(Oa,2)(0.5') O(Oe,2) }

Total effective -ve charge = -2.00 Total effective +ve charge = 2.00 Overall = 0.00

EV model CN = 6 l = 1

Substitution for vanadium octahedron. Scheme 3a

3.0 { V(V) O(Oa,2) O(Oe,2) } --> { M(V)( 4') O(Oa,2) O(Oe, 2.0) } + 2.0 { V(V) O(Oa,2) O(Oe) [](Oe)(..) }

Total effective -ve charge = -4.00 Total effective +ve charge = 4.00 Overall = 0.00

Substitution for vanadium tetrahedron. Scheme 3b

{ V(V) O(Oa,2) O(Oe) [](Oe) } + 3.0 { V(V) O(Oa,2) O(Oe,2) } --> { M(V)( 4') O(Oa,2) O(Oe) O(Oe, 1.0)" } + 3.0 { V(V) O(Oa,2) O(Oe) [](Oe)(..) }

Total effective -ve charge = -6.00 Total effective +ve charge = 6.00 Overall = 0.00

Substitution for average vanadium polyhedron. Scheme 3c

6.0 { V(V) O(Oa,2) O(Oe,1.5) [](Oe,0.5) } --> { M(V)( 4') O(Oa,2) O(Oe) O(Oe, 1.0)( 1') } + 5.0 { V(V) O(Oa,2) O(Oe) [](Oe)(.) }

Total effective -ve charge = -5.00 Total effective +ve charge = 5.00 Overall = 0.00

AV model CN = 6 l = 1

Substitution for vanadium octahedron. Scheme 6a

2.000 { V(V) O(Oa,2) O(Oe,2) } --> { M(V)( 4') O(Oa, 2.0) O(Oe,2) } + 1.000 { V(V) [](Oa,2)(..) O(Oe,2) }

Total effective -ve charge = -4.00 Total effective +ve charge = 4.00 Overall = 0.00

Substitution for vanadium tetrahedron. Scheme 6b

{ V(V) [](Oa,2) O(Oe,2) } + 2.000 { V(V) O(Oa,2) O(Oe,2) } --> { M(V)( 4') O(Oa, 2.0)(") O(Oe,2) } + 2.000 { V(V) [](Oa,2)(..) O(Oe,2) }

Total effective -ve charge = -8.00 Total effective +ve charge = 8.00 Overall = 0.00

Substitution for average vanadium polyhedron. Scheme 6c

2.667 { V(V) O(Oa,1.5) [](Oa,0.5) O(Oe,2) } --> { M(V)( 4') O(Oa, 2.0)( 0.5') O(Oe,2) } + 1.667 { V(V) [](Oa,2)(1.5 .) O(Oe,2) }

Total effective -ve charge = -5.00 Total effective +ve charge = 5.00 Overall = 0.00

EV model CN = 6 l = 2

Substitution for vanadium octahedron. Scheme 3a

2.5 { V(V) O(Oa,2) O(Oe,2) } --> { M(V)( 3') O(Oa,2) O(Oe, 2.0) } + 1.5 { V(V) O(Oa,2) O(Oe) [](Oe)(..) }

Total effective -ve charge = -3.00 Total effective +ve charge = 3.00 Overall = 0.00

Substitution for vanadium tetrahedron. Scheme 3b

{ V(V) O(Oa,2) O(Oe) [](Oe) } + 2.5 { V(V) O(Oa,2) O(Oe,2) } --> { M(V)( 3') O(Oa,2) O(Oe) O(Oe, 1.0)" } + 2.5 { V(V) O(Oa,2) O(Oe) [](Oe)(..) }

Total effective -ve charge = -5.00 Total effective +ve charge = 5.00 Overall = 0.00

Substitution for average vanadium polyhedron. Scheme 3c

5.0 { V(V) O(Oa,2) O(Oe,1.5) [](Oe,0.5) } --> { M(V)( 3') O(Oa,2) O(Oe) O(Oe, 1.0)( 1') } + 4.0 { V(V) O(Oa,2) O(Oe) [](Oe)(.) }

Total effective -ve charge = -4.00 Total effective +ve charge = 4.00 Overall = 0.00

AV model CN = 6 l = 2

Substitution for vanadium octahedron. Scheme 6a

1.750 { V(V) O(Oa,2) O(Oe,2) } --> { M(V)( 3') O(Oa, 2.0) O(Oe,2) } + 0.750 { V(V) [](Oa,2)(..) O(Oe,2) }

Total effective -ve charge = -3.00 Total effective +ve charge = 3.00 Overall = 0.00

Substitution for vanadium tetrahedron. Scheme 6b

{ V(V) [](Oa,2) O(Oe,2) } + 1.750 { V(V) O(Oa,2) O(Oe,2) } --> { M(V)( 3') O(Oa, 2.0)(") O(Oe,2) } + 1.750 { V(V) [](Oa,2)(..) O(Oe,2) }

Total effective -ve charge = -7.00 Total effective +ve charge = 7.00 Overall = 0.00

Substitution for average vanadium polyhedron. Scheme 6c

2.333 { V(V) O(Oa,1.5) [](Oa,0.5) O(Oe,2) } --> { M(V)( 3') O(Oa, 2.0)( 0.5') O(Oe,2) } + 1.333 { V(V) [](Oa,2)(1.5 .) O(Oe,2) }

Total effective -ve charge = -4.00 Total effective +ve charge = 4.00 Overall = 0.00

EV model CN = 6 l = 3

Substitution for vanadium octahedron. Scheme 3a

2.0 { V(V) O(Oa,2) O(Oe,2) } --> { M(V)( 2') O(Oa,2) O(Oe, 2.0) } + 1.0 { V(V) O(Oa,2) O(Oe) [](Oe)(..) }

Total effective -ve charge = -2.00 Total effective +ve charge = 2.00 Overall = 0.00

Substitution for vanadium tetrahedron. Scheme 3b

{ V(V) O(Oa,2) O(Oe) [](Oe) } + 2.0 { V(V) O(Oa,2) O(Oe,2) } --> { M(V)( 2') O(Oa,2) O(Oe) O(Oe, 1.0)" } + 2.0 { V(V) O(Oa,2) O(Oe) [](Oe)(..) }

Total effective -ve charge = -4.00 Total effective +ve charge = 4.00 Overall = 0.00

Substitution for average vanadium polyhedron. Scheme 3c

4.0 { V(V) O(Oa,2) O(Oe,1.5) [](Oe,0.5) } --> { M(V)( 2') O(Oa,2) O(Oe) O(Oe, 1.0)( 1') } + 3.0 { V(V) O(Oa,2) O(Oe) [](Oe)(.) }

Total effective -ve charge = -3.00 Total effective +ve charge = 3.00 Overall = 0.00

AV model CN = 6 l = 3

Substitution for vanadium octahedron. Scheme 6a

1.500 { V(V) O(Oa,2) O(Oe,2) } --> { M(V)( 2') O(Oa, 2.0) O(Oe,2) } + 0.500 { V(V) [](Oa,2)(..) O(Oe,2) }

Total effective -ve charge = -2.00 Total effective +ve charge = 2.00 Overall = 0.00

Substitution for vanadium tetrahedron. Scheme 6b

{ V(V) [](Oa,2) O(Oe,2) } + 1.500 { V(V) O(Oa,2) O(Oe,2) } --> { M(V)( 2') O(Oa, 2.0)(") O(Oe,2) } + 1.500 { V(V) [](Oa,2)(..) O(Oe,2) }

Total effective -ve charge = -6.00 Total effective +ve charge = 6.00 Overall = 0.00

Substitution for average vanadium polyhedron. Scheme 6c

2.000 { V(V) O(Oa,1.5) [](Oa,0.5) O(Oe,2) } --> { M(V)( 2') O(Oa, 2.0)( 0.5') O(Oe,2) } + 1.000 { V(V) [](Oa,2)(1.5 .) O(Oe,2) }

Total effective -ve charge = -3.00 Total effective +ve charge = 3.00 Overall = 0.00

EV model CN = 6 l = 4

Substitution for vanadium octahedron. Scheme 3a

1.5 { V(V) O(Oa,2) O(Oe,2) } --> { M(V)( 1') O(Oa,2) O(Oe, 2.0) } + 0.5 { V(V) O(Oa,2) O(Oe) [](Oe)(..) }

Total effective -ve charge = -1.00 Total effective +ve charge = 1.00 Overall = 0.00

Substitution for vanadium tetrahedron. Scheme 3b

{ V(V) O(Oa,2) O(Oe) [](Oe) } + 1.5 { V(V) O(Oa,2) O(Oe,2) } --> { M(V)( 1') O(Oa,2) O(Oe) O(Oe, 1.0)" } + 1.5 { V(V) O(Oa,2) O(Oe) [](Oe)(..) }

Total effective -ve charge = -3.00 Total effective +ve charge = 3.00 Overall = 0.00

Substitution for average vanadium polyhedron. Scheme 3c

3.0 { V(V) O(Oa,2) O(Oe,1.5) [](Oe,0.5) } --> { M(V)( 1') O(Oa,2) O(Oe) O(Oe, 1.0)( 1') } + 2.0 { V(V) O(Oa,2) O(Oe) [](Oe)(.) }

Total effective -ve charge = -2.00 Total effective +ve charge = 2.00 Overall = 0.00

AV model CN = 6 l = 4

Substitution for vanadium octahedron. Scheme 6a

1.250 { V(V) O(Oa,2) O(Oe,2) } --> { M(V)( 1') O(Oa, 2.0) O(Oe,2) } + 0.250 { V(V) [](Oa,2)(..) O(Oe,2) }

Total effective -ve charge = -1.00 Total effective +ve charge = 1.00 Overall = 0.00

Substitution for vanadium tetrahedron. Scheme 6b

{ V(V) [](Oa,2) O(Oe,2) } + 1.250 { V(V) O(Oa,2) O(Oe,2) } --> { M(V)( 1') O(Oa, 2.0)(") O(Oe,2) } + 1.250 { V(V) [](Oa,2)(..) O(Oe,2) }

Total effective -ve charge = -5.00 Total effective +ve charge = 5.00 Overall = 0.00

Substitution for average vanadium polyhedron. Scheme 6c

1.667 { V(V) O(Oa,1.5) [](Oa,0.5) O(Oe,2) } --> { M(V)( 1') O(Oa, 2.0)( 0.5') O(Oe,2) } + 0.667 { V(V) [](Oa,2)(1.5 .) O(Oe,2) }

Total effective -ve charge = -2.00 Total effective +ve charge = 2.00 Overall = 0.00

EV model CN = 6 l = 5

Substitution for vanadium octahedron. Scheme 5a

{ V(V) O(Oa,2) O(Oe,2) } --> { M(V)( 0') O(Oa,2) O(Oe, 2.0) }

Total effective -ve charge = 0.00 Total effective +ve charge = 0.00 Overall = 0.00

Substitution for vanadium tetrahedron. Scheme 3b

{ V(V) O(Oa,2) O(Oe) [](Oe) } + 1.0 { V(V) O(Oa,2) O(Oe,2) } --> { M(V)( 0') O(Oa,2) O(Oe) O(Oe, 1.0)" } + 1.0 { V(V) O(Oa,2) O(Oe) [](Oe)(..) }

Total effective -ve charge = -2.00 Total effective +ve charge = 2.00 Overall = 0.00

Substitution for average vanadium polyhedron. Scheme 3c

2.0 { V(V) O(Oa,2) O(Oe,1.5) [](Oe,0.5) } --> { M(V)( 0') O(Oa,2) O(Oe) O(Oe, 1.0)( 1') } + 1.0 { V(V) O(Oa,2) O(Oe) [](Oe)(.) }

Total effective -ve charge = -1.00 Total effective +ve charge = 1.00 Overall = 0.00

AV model CN = 6 l = 5

Substitution for vanadium octahedron. Scheme 8a

{ V(V) O(Oa,2) O(Oe,2) } --> { M(V)( 0') O(Oa, 2.0) O(Oe,2) }

Total effective -ve charge = 0.00 Total effective +ve charge = 0.00 Overall = 0.00

Substitution for vanadium tetrahedron. Scheme 6b

{ V(V) [](Oa,2) O(Oe,2) } + 1.000 { V(V) O(Oa,2) O(Oe,2) } --> { M(V)( 0') O(Oa, 2.0)(") O(Oe,2) } + 1.000 { V(V) [](Oa,2)(..) O(Oe,2) }

Total effective -ve charge = -4.00 Total effective +ve charge = 4.00 Overall = 0.00

Substitution for average vanadium polyhedron. Scheme 6c

1.333 { V(V) O(Oa,1.5) [](Oa,0.5) O(Oe,2) } --> { M(V)( 0') O(Oa, 2.0)( 0.5') O(Oe,2) } + 0.333 { V(V) [](Oa,2)(1.5 .) O(Oe,2) }

Total effective -ve charge = -1.00 Total effective +ve charge = 1.00 Overall = 0.00

EV model CN = 6 l = 6

Substitution for vanadium octahedron. Scheme 4a

{ V(V) O(Oa,2) O(Oe,2) } + 0.5 { V(V) O(Oa,2) O(Oe) [](Oe) } --> { M(V)(-1') O(Oa,2) O(Oe, 2.0) } + 0.5 { V(V) O(Oa,2) O(Oe) O(Oe)(") }

Total effective -ve charge = -1.00 Total effective +ve charge = 1.00 Overall = 0.00

Substitution for vanadium tetrahedron. Scheme 3b

{ V(V) O(Oa,2) O(Oe) [](Oe) } + 0.5 { V(V) O(Oa,2) O(Oe,2) } --> { M(V)(-1') O(Oa,2) O(Oe) O(Oe, 1.0)" } + 0.5 { V(V) O(Oa,2) O(Oe) [](Oe)(..) }

Total effective -ve charge = -2.00 Total effective +ve charge = 2.00 Overall = 0.00

Substitution for average vanadium polyhedron. Scheme 5c

{ V(V) O(Oa,2) O(Oe,1.5) [](Oe,0.5) } --> { M(V)(-1') O(Oa,2) O(Oe) O(Oe, 1.0)( 1') }

Total effective -ve charge = -1.00 Total effective +ve charge = 1.00 Overall = 0.00

AV model CN = 6 l = 6

Substitution for vanadium octahedron. Scheme 7a

{ V(V) O(Oa,2) O(Oe,2) } + 0.250 { V(V) [](Oa,2) O(Oe,2) } --> { M(V)(-1') O(Oa, 2.0) O(Oe,2) } + 0.250 { V(V) O(Oa,2)(") O(Oe,2) }

Total effective -ve charge = -1.00 Total effective +ve charge = 1.00 Overall = 0.00

Substitution for vanadium tetrahedron. Scheme 6b

{ V(V) [](Oa,2) O(Oe,2) } + 0.750 { V(V) O(Oa,2) O(Oe,2) } --> { M(V)(-1') O(Oa, 2.0)(") O(Oe,2) } + 0.750 { V(V) [](Oa,2)(..) O(Oe,2) }

Total effective -ve charge = -4.00 Total effective +ve charge = 4.00 Overall = 0.00

Substitution for average vanadium polyhedron. Scheme 8c

{ V(V) O(Oa,1.5) [](Oa,0.5) O(Oe,2) } --> { M(V)(-1') O(Oa, 2.0)( 0.5') O(Oe,2) }

Total effective -ve charge = -1.00 Total effective +ve charge = 1.00 Overall = 0.00

EV model shared interstitials CN = 7 l = 1

Substitution for vanadium octahedron. Scheme 9a

3.5 { V(V) O(Oa,2) O(Oe,2) } --> { M(V)( 4') O(Oa,2) O(Oe,2) O(Ois, 0.5)(") } + 2.5 { V(V) O(Oa,2) O(Oe) [](Oe)(..) }

Total effective -ve charge = -5.00 Total effective +ve charge = 5.00 Overall = 0.00

Substitution for vanadium tetrahedron. Scheme 9b

{ V(V) O(Oa,2) O(Oe) [](Oe) } + 3.5{ V(V) O(Oa,2) O(Oe,2) } --> { M(V)( 4') O(Oa,2) O(Oe) O(Oe)(") O(Ois, 0.5)(") } + 3.5 { V(V) O(Oa,2) O(Oe) [](Oe)(..) }

Total effective -ve charge = -7.00 Total effective +ve charge = 7.00 Overall = 0.00

Substitution for average vanadium polyhedron. Scheme 9c

7 { V(V) O(Oa,2) O(Oe,1.5) [](Oe,0.5) } --> { M(V)( 4') O(Oa,2) O(Oe,1.5) O(Oe,0.5)(") O(Ois, 0.5)(") } + 6 { V(V) O(Oa,2) O(Oe) [](Oe)(.) }

Total effective -ve charge = -6.00 Total effective +ve charge = 6.00 Overall = 0.00

EV model unshared interstitials CN = 7 l = 1

Substitution for vanadium octahedron. Scheme 10a

4.0 { V(V) O(Oa,2) O(Oe,2) } --> { M(V)( 4') O(Oa,2) O(Oe,2) O(Oiu, 1.0)(") } + 3.0 { V(V) O(Oa,2) O(Oe) [](Oe)(..) }

Total effective -ve charge = -6.00 Total effective +ve charge = 6.00 Overall = 0.00

Substitution for vanadium tetrahedron. Scheme 10b

{ V(V) O(Oa,2) O(Oe) [](Oe) } + 4.0{ V(V) O(Oa,2) O(Oe,2) } --> { M(V)( 4') O(Oa,2) O(Oe) O(Oe)(") O(Oiu, 1.0)(") } + 4.0 { V(V) O(Oa,2) O(Oe) [](Oe)(..) }

Total effective -ve charge = -8.00 Total effective +ve charge = 8.00 Overall = 0.00

Substitution for average vanadium polyhedron. Scheme 10c

8 { V(V) O(Oa,2) O(Oe,1.5) [](Oe,0.5) } --> { M(V)( 4') O(Oa,2) O(Oe,1.5) O(Oe,0.5)(") O(Oiu, 1.0)(") } + 7 { V(V) O(Oa,2) O(Oe) [](Oe)(.) }

Total effective -ve charge = -7.00 Total effective +ve charge = 7.00 Overall = 0.00

AV model shared interstitials CN = 7 l = 1

Substitution for vanadium octahedron. Scheme 11a

2.250 { V(V) O(Oa,2) O(Oe,2) } --> { M(V)( 4') O(Oa,2) O(Oe,2) O(Ois, 0.5)(") } + 1.250 { V(V) [](Oa,2)(..) O(Oe,2) }

Total effective -ve charge = -5.00 Total effective +ve charge = 5.00 Overall = 0.00

Substitution for vanadium tetrahedron. Scheme 11b

{ V(V) [](Oa,2) O(Oe,2) } + 2.250{ V(V) O(Oa,2) O(Oe,2) } --> { M(V)( 4') O(Oa,2)(") O(Oe,2) O(Ois, 0.5)(") } + 2.250 { V(V) [](Oa,2)(..) O(Oe,2) }

Total effective -ve charge = -9.00 Total effective +ve charge = 9.00 Overall = 0.00

Substitution for average vanadium polyhedron. Scheme 11c

3.000 { V(V) O(Oa,1.5) [](Oa,0.5) O(Oe,2) } --> { M(V)( 4') O(Oa,2)(0.5') O(Oe,2) O(Ois, 0.5)(") } + 2.000 { V(V) [](Oa,2)(1.5 .) O(Oe,2) }

Total effective -ve charge = -6.00 Total effective +ve charge = 6.00 Overall = 0.00

AV model unshared interstitials CN = 7 l = 1

Substitution for vanadium octahedron. Scheme 12a

2.500 { V(V) O(Oa,2) O(Oe,2) } --> { M(V)( 4') O(Oa,2) O(Oe,2) O(Oiu, 1.0)(") } + 1.500 { V(V) [](Oa,2)(..) O(Oe,2) }

Total effective -ve charge = -6.00 Total effective +ve charge = 6.00 Overall = 0.00

Substitution for vanadium tetrahedron. Scheme 12b

{ V(V) [](Oa,2) O(Oe,2) } + 2.500{ V(V) O(Oa,2) O(Oe,2) } --> { M(V)( 4') O(Oa,2)(") O(Oe,2) O(Oiu, 1.0)(") } + 2.500 { V(V) [](Oa,2)(..) O(Oe,2) }

Total effective -ve charge = -10.00 Total effective +ve charge = 10.00 Overall = 0.00

Substitution for average vanadium polyhedron. Scheme 12c

3.333 { V(V) O(Oa,1.5) [](Oa,0.5) O(Oe,2) } --> { M(V)( 4') O(Oa,2)(0.5') O(Oe,2) O(Oiu, 1.0)(") } + 2.333 { V(V) [](Oa,2)(1.5 .) O(Oe,2) }

Total effective -ve charge = -7.00 Total effective +ve charge = 7.00 Overall = 0.00

EV model shared interstitials CN = 7 l = 2

Substitution for vanadium octahedron. Scheme 9a

3.0 { V(V) O(Oa,2) O(Oe,2) } --> { M(V)( 3') O(Oa,2) O(Oe,2) O(Ois, 0.5)(") } + 2.0 { V(V) O(Oa,2) O(Oe) [](Oe)(..) }

Total effective -ve charge = -4.00 Total effective +ve charge = 4.00 Overall = 0.00

Substitution for vanadium tetrahedron. Scheme 9b

{ V(V) O(Oa,2) O(Oe) [](Oe) } + 3.0{ V(V) O(Oa,2) O(Oe,2) } --> { M(V)( 3') O(Oa,2) O(Oe) O(Oe)(") O(Ois, 0.5)(") } + 3.0 { V(V) O(Oa,2) O(Oe) [](Oe)(..) }

Total effective -ve charge = -6.00 Total effective +ve charge = 6.00 Overall = 0.00

Substitution for average vanadium polyhedron. Scheme 9c

6 { V(V) O(Oa,2) O(Oe,1.5) [](Oe,0.5) } --> { M(V)( 3') O(Oa,2) O(Oe,1.5) O(Oe,0.5)(") O(Ois, 0.5)(") } + 5 { V(V) O(Oa,2) O(Oe) [](Oe)(.) }

Total effective -ve charge = -5.00 Total effective +ve charge = 5.00 Overall = 0.00

EV model unshared interstitials CN = 7 l = 2

Substitution for vanadium octahedron. Scheme 10a

3.5 { V(V) O(Oa,2) O(Oe,2) } --> { M(V)( 3') O(Oa,2) O(Oe,2) O(Oiu, 1.0)(") } + 2.5 { V(V) O(Oa,2) O(Oe) [](Oe)(..) }

Total effective -ve charge = -5.00 Total effective +ve charge = 5.00 Overall = 0.00

Substitution for vanadium tetrahedron. Scheme 10b

{ V(V) O(Oa,2) O(Oe) [](Oe) } + 3.5{ V(V) O(Oa,2) O(Oe,2) } --> { M(V)( 3') O(Oa,2) O(Oe) O(Oe)(") O(Oiu, 1.0)(") } + 3.5 { V(V) O(Oa,2) O(Oe) [](Oe)(..) }

Total effective -ve charge = -7.00 Total effective +ve charge = 7.00 Overall = 0.00

Substitution for average vanadium polyhedron. Scheme 10c

7 { V(V) O(Oa,2) O(Oe,1.5) [](Oe,0.5) } --> { M(V)( 3') O(Oa,2) O(Oe,1.5) O(Oe,0.5)(") O(Oiu, 1.0)(") } + 6 { V(V) O(Oa,2) O(Oe) [](Oe)(.) }

Total effective -ve charge = -6.00 Total effective +ve charge = 6.00 Overall = 0.00

AV model shared interstitials CN = 7 l = 2

Substitution for vanadium octahedron. Scheme 11a

2.000 { V(V) O(Oa,2) O(Oe,2) } --> { M(V)( 3') O(Oa,2) O(Oe,2) O(Ois, 0.5)(") } + 1.000 { V(V) [](Oa,2)(..) O(Oe,2) }

Total effective -ve charge = -4.00 Total effective +ve charge = 4.00 Overall = 0.00

Substitution for vanadium tetrahedron. Scheme 11b

{ V(V) [](Oa,2) O(Oe,2) } + 2.000{ V(V) O(Oa,2) O(Oe,2) } --> { M(V)( 3') O(Oa,2)(") O(Oe,2) O(Ois, 0.5)(") } + 2.000 { V(V) [](Oa,2)(..) O(Oe,2) }

Total effective -ve charge = -8.00 Total effective +ve charge = 8.00 Overall = 0.00

Substitution for average vanadium polyhedron. Scheme 11c

2.667 { V(V) O(Oa,1.5) [](Oa,0.5) O(Oe,2) } --> { M(V)( 3') O(Oa,2)(0.5') O(Oe,2) O(Ois, 0.5)(") } + 1.667 { V(V) [](Oa,2)(1.5 .) O(Oe,2) }

Total effective -ve charge = -5.00 Total effective +ve charge = 5.00 Overall = 0.00

AV model unshared interstitials CN = 7 l = 2

Substitution for vanadium octahedron. Scheme 12a

2.250 { V(V) O(Oa,2) O(Oe,2) } --> { M(V)( 3') O(Oa,2) O(Oe,2) O(Oiu, 1.0)(") } + 1.250 { V(V) [](Oa,2)(..) O(Oe,2) }

Total effective -ve charge = -5.00 Total effective +ve charge = 5.00 Overall = 0.00

Substitution for vanadium tetrahedron. Scheme 12b

{ V(V) [](Oa,2) O(Oe,2) } + 2.250{ V(V) O(Oa,2) O(Oe,2) } --> { M(V)( 3') O(Oa,2)(") O(Oe,2) O(Oiu, 1.0)(") } + 2.250 { V(V) [](Oa,2)(..) O(Oe,2) }

Total effective -ve charge = -9.00 Total effective +ve charge = 9.00 Overall = 0.00

Substitution for average vanadium polyhedron. Scheme 12c

3.000 { V(V) O(Oa,1.5) [](Oa,0.5) O(Oe,2) } --> { M(V)( 3') O(Oa,2)(0.5') O(Oe,2) O(Oiu, 1.0)(") } + 2.000 { V(V) [](Oa,2)(1.5 .) O(Oe,2) }

Total effective -ve charge = -6.00 Total effective +ve charge = 6.00 Overall = 0.00

EV model shared interstitials CN = 7 l = 3

Substitution for vanadium octahedron. Scheme 9a

2.5 { V(V) O(Oa,2) O(Oe,2) } --> { M(V)( 2') O(Oa,2) O(Oe,2) O(Ois, 0.5)(") } + 1.5 { V(V) O(Oa,2) O(Oe) [](Oe)(..) }

Total effective -ve charge = -3.00 Total effective +ve charge = 3.00 Overall = 0.00

Substitution for vanadium tetrahedron. Scheme 9b

{ V(V) O(Oa,2) O(Oe) [](Oe) } + 2.5{ V(V) O(Oa,2) O(Oe,2) } --> { M(V)( 2') O(Oa,2) O(Oe) O(Oe)(") O(Ois, 0.5)(") } + 2.5 { V(V) O(Oa,2) O(Oe) [](Oe)(..) }

Total effective -ve charge = -5.00 Total effective +ve charge = 5.00 Overall = 0.00

Substitution for average vanadium polyhedron. Scheme 9c

5 { V(V) O(Oa,2) O(Oe,1.5) [](Oe,0.5) } --> { M(V)( 2') O(Oa,2) O(Oe,1.5) O(Oe,0.5)(") O(Ois, 0.5)(") } + 4 { V(V) O(Oa,2) O(Oe) [](Oe)(.) }

Total effective -ve charge = -4.00 Total effective +ve charge = 4.00 Overall = 0.00

EV model unshared interstitials CN = 7 l = 3

Substitution for vanadium octahedron. Scheme 10a

3.0 { V(V) O(Oa,2) O(Oe,2) } --> { M(V)( 2') O(Oa,2) O(Oe,2) O(Oiu, 1.0)(") } + 2.0 { V(V) O(Oa,2) O(Oe) [](Oe)(..) }

Total effective -ve charge = -4.00 Total effective +ve charge = 4.00 Overall = 0.00

Substitution for vanadium tetrahedron. Scheme 10b

{ V(V) O(Oa,2) O(Oe) [](Oe) } + 3.0{ V(V) O(Oa,2) O(Oe,2) } --> { M(V)( 2') O(Oa,2) O(Oe) O(Oe)(") O(Oiu, 1.0)(") } + 3.0 { V(V) O(Oa,2) O(Oe) [](Oe)(..) }

Total effective -ve charge = -6.00 Total effective +ve charge = 6.00 Overall = 0.00

Substitution for average vanadium polyhedron. Scheme 10c

6 { V(V) O(Oa,2) O(Oe,1.5) [](Oe,0.5) } --> { M(V)( 2') O(Oa,2) O(Oe,1.5) O(Oe,0.5)(") O(Oiu, 1.0)(") } + 5 { V(V) O(Oa,2) O(Oe) [](Oe)(.) }

Total effective -ve charge = -5.00 Total effective +ve charge = 5.00 Overall = 0.00

AV model shared interstitials CN = 7 l = 3

Substitution for vanadium octahedron. Scheme 11a

1.750 { V(V) O(Oa,2) O(Oe,2) } --> { M(V)( 2') O(Oa,2) O(Oe,2) O(Ois, 0.5)(") } + 0.750 { V(V) [](Oa,2)(..) O(Oe,2) }

Total effective -ve charge = -3.00 Total effective +ve charge = 3.00 Overall = 0.00

Substitution for vanadium tetrahedron. Scheme 11b

{ V(V) [](Oa,2) O(Oe,2) } + 1.750{ V(V) O(Oa,2) O(Oe,2) } --> { M(V)( 2') O(Oa,2)(") O(Oe,2) O(Ois, 0.5)(") } + 1.750 { V(V) [](Oa,2)(..) O(Oe,2) }

Total effective -ve charge = -7.00 Total effective +ve charge = 7.00 Overall = 0.00

Substitution for average vanadium polyhedron. Scheme 11c

2.333 { V(V) O(Oa,1.5) [](Oa,0.5) O(Oe,2) } --> { M(V)( 2') O(Oa,2)(0.5') O(Oe,2) O(Ois, 0.5)(") } + 1.333 { V(V) [](Oa,2)(1.5 .) O(Oe,2) }

Total effective -ve charge = -4.00 Total effective +ve charge = 4.00 Overall = 0.00

AV model unshared interstitials CN = 7 l = 3

Substitution for vanadium octahedron. Scheme 12a

2.000 { V(V) O(Oa,2) O(Oe,2) } --> { M(V)( 2') O(Oa,2) O(Oe,2) O(Oiu, 1.0)(") } + 1.000 { V(V) [](Oa,2)(..) O(Oe,2) }

Total effective -ve charge = -4.00 Total effective +ve charge = 4.00 Overall = 0.00

Substitution for vanadium tetrahedron. Scheme 12b

{ V(V) [](Oa,2) O(Oe,2) } + 2.000{ V(V) O(Oa,2) O(Oe,2) } --> { M(V)( 2') O(Oa,2)(") O(Oe,2) O(Oiu, 1.0)(") } + 2.000 { V(V) [](Oa,2)(..) O(Oe,2) }

Total effective -ve charge = -8.00 Total effective +ve charge = 8.00 Overall = 0.00

Substitution for average vanadium polyhedron. Scheme 12c

2.667 { V(V) O(Oa,1.5) [](Oa,0.5) O(Oe,2) } --> { M(V)( 2') O(Oa,2)(0.5') O(Oe,2) O(Oiu, 1.0)(") } + 1.667 { V(V) [](Oa,2)(1.5 .) O(Oe,2) }

Total effective -ve charge = -5.00 Total effective +ve charge = 5.00 Overall = 0.00

EV model shared interstitials CN = 7 l = 4

Substitution for vanadium octahedron. Scheme 9a

2.0 { V(V) O(Oa,2) O(Oe,2) } --> { M(V)( 1') O(Oa,2) O(Oe,2) O(Ois, 0.5)(") } + 1.0 { V(V) O(Oa,2) O(Oe) [](Oe)(..) }

Total effective -ve charge = -2.00 Total effective +ve charge = 2.00 Overall = 0.00

Substitution for vanadium tetrahedron. Scheme 9b

{ V(V) O(Oa,2) O(Oe) [](Oe) } + 2.0{ V(V) O(Oa,2) O(Oe,2) } --> { M(V)( 1') O(Oa,2) O(Oe) O(Oe)(") O(Ois, 0.5)(") } + 2.0 { V(V) O(Oa,2) O(Oe) [](Oe)(..) }

Total effective -ve charge = -4.00 Total effective +ve charge = 4.00 Overall = 0.00

Substitution for average vanadium polyhedron. Scheme 9c

4 { V(V) O(Oa,2) O(Oe,1.5) [](Oe,0.5) } --> { M(V)( 1') O(Oa,2) O(Oe,1.5) O(Oe,0.5)(") O(Ois, 0.5)(") } + 3 { V(V) O(Oa,2) O(Oe) [](Oe)(.) }

Total effective -ve charge = -3.00 Total effective +ve charge = 3.00 Overall = 0.00

EV model unshared interstitials CN = 7 l = 4

Substitution for vanadium octahedron. Scheme 10a

2.5 { V(V) O(Oa,2) O(Oe,2) } --> { M(V)( 1') O(Oa,2) O(Oe,2) O(Oiu, 1.0)(") } + 1.5 { V(V) O(Oa,2) O(Oe) [](Oe)(..) }

Total effective -ve charge = -3.00 Total effective +ve charge = 3.00 Overall = 0.00

Substitution for vanadium tetrahedron. Scheme 10b

{ V(V) O(Oa,2) O(Oe) [](Oe) } + 2.5{ V(V) O(Oa,2) O(Oe,2) } --> { M(V)( 1') O(Oa,2) O(Oe) O(Oe)(") O(Oiu, 1.0)(") } + 2.5 { V(V) O(Oa,2) O(Oe) [](Oe)(..) }

Total effective -ve charge = -5.00 Total effective +ve charge = 5.00 Overall = 0.00

Substitution for average vanadium polyhedron. Scheme 10c

5 { V(V) O(Oa,2) O(Oe,1.5) [](Oe,0.5) } --> { M(V)( 1') O(Oa,2) O(Oe,1.5) O(Oe,0.5)(") O(Oiu, 1.0)(") } + 4 { V(V) O(Oa,2) O(Oe) [](Oe)(.) }

Total effective -ve charge = -4.00 Total effective +ve charge = 4.00 Overall = 0.00

AV model shared interstitials CN = 7 l = 4

Substitution for vanadium octahedron. Scheme 11a

1.500 { V(V) O(Oa,2) O(Oe,2) } --> { M(V)( 1') O(Oa,2) O(Oe,2) O(Ois, 0.5)(") } + 0.500 { V(V) [](Oa,2)(..) O(Oe,2) }

Total effective -ve charge = -2.00 Total effective +ve charge = 2.00 Overall = 0.00

Substitution for vanadium tetrahedron. Scheme 11b

{ V(V) [](Oa,2) O(Oe,2) } + 1.500{ V(V) O(Oa,2) O(Oe,2) } --> { M(V)( 1') O(Oa,2)(") O(Oe,2) O(Ois, 0.5)(") } + 1.500 { V(V) [](Oa,2)(..) O(Oe,2) }

Total effective -ve charge = -6.00 Total effective +ve charge = 6.00 Overall = 0.00

Substitution for average vanadium polyhedron. Scheme 11c

2.000 { V(V) O(Oa,1.5) [](Oa,0.5) O(Oe,2) } --> { M(V)( 1') O(Oa,2)(0.5') O(Oe,2) O(Ois, 0.5)(") } + 1.000 { V(V) [](Oa,2)(1.5 .) O(Oe,2) }

Total effective -ve charge = -3.00 Total effective +ve charge = 3.00 Overall = 0.00

AV model unshared interstitials CN = 7 l = 4

Substitution for vanadium octahedron. Scheme 12a

1.750 { V(V) O(Oa,2) O(Oe,2) } --> { M(V)( 1') O(Oa,2) O(Oe,2) O(Oiu, 1.0)(") } + 0.750 { V(V) [](Oa,2)(..) O(Oe,2) }

Total effective -ve charge = -3.00 Total effective +ve charge = 3.00 Overall = 0.00

Substitution for vanadium tetrahedron. Scheme 12b

{ V(V) [](Oa,2) O(Oe,2) } + 1.750{ V(V) O(Oa,2) O(Oe,2) } --> { M(V)( 1') O(Oa,2)(") O(Oe,2) O(Oiu, 1.0)(") } + 1.750 { V(V) [](Oa,2)(..) O(Oe,2) }

Total effective -ve charge = -7.00 Total effective +ve charge = 7.00 Overall = 0.00

Substitution for average vanadium polyhedron. Scheme 12c

2.333 { V(V) O(Oa,1.5) [](Oa,0.5) O(Oe,2) } --> { M(V)( 1') O(Oa,2)(0.5') O(Oe,2) O(Oiu, 1.0)(") } + 1.333 { V(V) [](Oa,2)(1.5 .) O(Oe,2) }

Total effective -ve charge = -4.00 Total effective +ve charge = 4.00 Overall = 0.00

EV model shared interstitials CN = 7 l = 5

Substitution for vanadium octahedron. Scheme 9a

1.5 { V(V) O(Oa,2) O(Oe,2) } --> { M(V)( 0') O(Oa,2) O(Oe,2) O(Ois, 0.5)(") } + 0.5 { V(V) O(Oa,2) O(Oe) [](Oe)(..) }

Total effective -ve charge = -1.00 Total effective +ve charge = 1.00 Overall = 0.00

Substitution for vanadium tetrahedron. Scheme 9b

{ V(V) O(Oa,2) O(Oe) [](Oe) } + 1.5{ V(V) O(Oa,2) O(Oe,2) } --> { M(V)( 0') O(Oa,2) O(Oe) O(Oe)(") O(Ois, 0.5)(") } + 1.5 { V(V) O(Oa,2) O(Oe) [](Oe)(..) }

Total effective -ve charge = -3.00 Total effective +ve charge = 3.00 Overall = 0.00

Substitution for average vanadium polyhedron. Scheme 9c

3 { V(V) O(Oa,2) O(Oe,1.5) [](Oe,0.5) } --> { M(V)( 0') O(Oa,2) O(Oe,1.5) O(Oe,0.5)(") O(Ois, 0.5)(") } + 2 { V(V) O(Oa,2) O(Oe) [](Oe)(.) }

Total effective -ve charge = -2.00 Total effective +ve charge = 2.00 Overall = 0.00

EV model unshared interstitials CN = 7 l = 5

Substitution for vanadium octahedron. Scheme 10a

2.0 { V(V) O(Oa,2) O(Oe,2) } --> { M(V)( 0') O(Oa,2) O(Oe,2) O(Oiu, 1.0)(") } + 1.0 { V(V) O(Oa,2) O(Oe) [](Oe)(..) }

Total effective -ve charge = -2.00 Total effective +ve charge = 2.00 Overall = 0.00

Substitution for vanadium tetrahedron. Scheme 10b

{ V(V) O(Oa,2) O(Oe) [](Oe) } + 2.0{ V(V) O(Oa,2) O(Oe,2) } --> { M(V)( 0') O(Oa,2) O(Oe) O(Oe)(") O(Oiu, 1.0)(") } + 2.0 { V(V) O(Oa,2) O(Oe) [](Oe)(..) }

Total effective -ve charge = -4.00 Total effective +ve charge = 4.00 Overall = 0.00

Substitution for average vanadium polyhedron. Scheme 10c

4 { V(V) O(Oa,2) O(Oe,1.5) [](Oe,0.5) } --> { M(V)( 0') O(Oa,2) O(Oe,1.5) O(Oe,0.5)(") O(Oiu, 1.0)(") } + 3 { V(V) O(Oa,2) O(Oe) [](Oe)(.) }

Total effective -ve charge = -3.00 Total effective +ve charge = 3.00 Overall = 0.00

AV model shared interstitials CN = 7 l = 5

Substitution for vanadium octahedron. Scheme 11a

1.250 { V(V) O(Oa,2) O(Oe,2) } --> { M(V)( 0') O(Oa,2) O(Oe,2) O(Ois, 0.5)(") } + 0.250 { V(V) [](Oa,2)(..) O(Oe,2) }

Total effective -ve charge = -1.00 Total effective +ve charge = 1.00 Overall = 0.00

Substitution for vanadium tetrahedron. Scheme 11b

{ V(V) [](Oa,2) O(Oe,2) } + 1.250{ V(V) O(Oa,2) O(Oe,2) } --> { M(V)( 0') O(Oa,2)(") O(Oe,2) O(Ois, 0.5)(") } + 1.250 { V(V) [](Oa,2)(..) O(Oe,2) }

Total effective -ve charge = -5.00 Total effective +ve charge = 5.00 Overall = 0.00

Substitution for average vanadium polyhedron. Scheme 11c

1.667 { V(V) O(Oa,1.5) [](Oa,0.5) O(Oe,2) } --> { M(V)( 0') O(Oa,2)(0.5') O(Oe,2) O(Ois, 0.5)(") } + 0.667 { V(V) [](Oa,2)(1.5 .) O(Oe,2) }

Total effective -ve charge = -2.00 Total effective +ve charge = 2.00 Overall = 0.00

AV model unshared interstitials CN = 7 l = 5

Substitution for vanadium octahedron. Scheme 12a

1.500 { V(V) O(Oa,2) O(Oe,2) } --> { M(V)( 0') O(Oa,2) O(Oe,2) O(Oiu, 1.0)(") } + 0.500 { V(V) [](Oa,2)(..) O(Oe,2) }

Total effective -ve charge = -2.00 Total effective +ve charge = 2.00 Overall = 0.00

Substitution for vanadium tetrahedron. Scheme 12b

{ V(V) [](Oa,2) O(Oe,2) } + 1.500{ V(V) O(Oa,2) O(Oe,2) } --> { M(V)( 0') O(Oa,2)(") O(Oe,2) O(Oiu, 1.0)(") } + 1.500 { V(V) [](Oa,2)(..) O(Oe,2) }

Total effective -ve charge = -6.00 Total effective +ve charge = 6.00 Overall = 0.00

Substitution for average vanadium polyhedron. Scheme 12c

2.000 { V(V) O(Oa,1.5) [](Oa,0.5) O(Oe,2) } --> { M(V)( 0') O(Oa,2)(0.5') O(Oe,2) O(Oiu, 1.0)(") } + 1.000 { V(V) [](Oa,2)(1.5 .) O(Oe,2) }

Total effective -ve charge = -3.00 Total effective +ve charge = 3.00 Overall = 0.00

EV model shared interstitials CN = 7 l = 6

Substitution for vanadium octahedron. Scheme 9a

1.0 { V(V) O(Oa,2) O(Oe,2) } --> { M(V)(-1') O(Oa,2) O(Oe,2) O(Ois, 0.5)(") }

Total effective -ve charge = -1.00 Total effective +ve charge = 1.00 Overall = 0.00

Substitution for vanadium tetrahedron. Scheme 9b

{ V(V) O(Oa,2) O(Oe) [](Oe) } + 1.0{ V(V) O(Oa,2) O(Oe,2) } --> { M(V)(-1') O(Oa,2) O(Oe) O(Oe)(") O(Ois, 0.5)(") } + 1.0 { V(V) O(Oa,2) O(Oe) [](Oe)(..) }

Total effective -ve charge = -3.00 Total effective +ve charge = 3.00 Overall = 0.00

Substitution for average vanadium polyhedron. Scheme 9c

2 { V(V) O(Oa,2) O(Oe,1.5) [](Oe,0.5) } --> { M(V)(-1') O(Oa,2) O(Oe,1.5) O(Oe,0.5)(") O(Ois, 0.5)(") } + 1 { V(V) O(Oa,2) O(Oe) [](Oe)(.) }

Total effective -ve charge = -2.00 Total effective +ve charge = 2.00 Overall = 0.00

EV model unshared interstitials CN = 7 l = 6

Substitution for vanadium octahedron. Scheme 10a

1.5 { V(V) O(Oa,2) O(Oe,2) } --> { M(V)(-1') O(Oa,2) O(Oe,2) O(Oiu, 1.0)(") } + 0.5 { V(V) O(Oa,2) O(Oe) [](Oe)(..) }

Total effective -ve charge = -2.00 Total effective +ve charge = 2.00 Overall = 0.00

Substitution for vanadium tetrahedron. Scheme 10b

{ V(V) O(Oa,2) O(Oe) [](Oe) } + 1.5{ V(V) O(Oa,2) O(Oe,2) } --> { M(V)(-1') O(Oa,2) O(Oe) O(Oe)(") O(Oiu, 1.0)(") } + 1.5 { V(V) O(Oa,2) O(Oe) [](Oe)(..) }

Total effective -ve charge = -4.00 Total effective +ve charge = 4.00 Overall = 0.00

Substitution for average vanadium polyhedron. Scheme 10c

3 { V(V) O(Oa,2) O(Oe,1.5) [](Oe,0.5) } --> { M(V)(-1') O(Oa,2) O(Oe,1.5) O(Oe,0.5)(") O(Oiu, 1.0)(") } + 2 { V(V) O(Oa,2) O(Oe) [](Oe)(.) }

Total effective -ve charge = -3.00 Total effective +ve charge = 3.00 Overall = 0.00

AV model shared interstitials CN = 7 l = 6

Substitution for vanadium octahedron. Scheme 11a

1.000 { V(V) O(Oa,2) O(Oe,2) } --> { M(V)(-1') O(Oa,2) O(Oe,2) O(Ois, 0.5)(") }

Total effective -ve charge = -1.00 Total effective +ve charge = 1.00 Overall = 0.00

Substitution for vanadium tetrahedron. Scheme 11b

{ V(V) [](Oa,2) O(Oe,2) } + 1.000{ V(V) O(Oa,2) O(Oe,2) } --> { M(V)(-1') O(Oa,2)(") O(Oe,2) O(Ois, 0.5)(") } + 1.000 { V(V) [](Oa,2)(..) O(Oe,2) }

Total effective -ve charge = -5.00 Total effective +ve charge = 5.00 Overall = 0.00

Substitution for average vanadium polyhedron. Scheme 11c

1.333 { V(V) O(Oa,1.5) [](Oa,0.5) O(Oe,2) } --> { M(V)(-1') O(Oa,2)(0.5') O(Oe,2) O(Ois, 0.5)(") } + 0.333 { V(V) [](Oa,2)(1.5 .) O(Oe,2) }

Total effective -ve charge = -2.00 Total effective +ve charge = 2.00 Overall = 0.00

AV model unshared interstitials CN = 7 l = 6

Substitution for vanadium octahedron. Scheme 12a

1.250 { V(V) O(Oa,2) O(Oe,2) } --> { M(V)(-1') O(Oa,2) O(Oe,2) O(Oiu, 1.0)(") } + 0.250 { V(V) [](Oa,2)(..) O(Oe,2) }

Total effective -ve charge = -2.00 Total effective +ve charge = 2.00 Overall = 0.00

Substitution for vanadium tetrahedron. Scheme 12b

{ V(V) [](Oa,2) O(Oe,2) } + 1.250{ V(V) O(Oa,2) O(Oe,2) } --> { M(V)(-1') O(Oa,2)(") O(Oe,2) O(Oiu, 1.0)(") } + 1.250 { V(V) [](Oa,2)(..) O(Oe,2) }

Total effective -ve charge = -6.00 Total effective +ve charge = 6.00 Overall = 0.00

Substitution for average vanadium polyhedron. Scheme 12c

1.667 { V(V) O(Oa,1.5) [](Oa,0.5) O(Oe,2) } --> { M(V)(-1') O(Oa,2)(0.5') O(Oe,2) O(Oiu, 1.0)(") } + 0.667 { V(V) [](Oa,2)(1.5 .) O(Oe,2) }

Total effective -ve charge = -3.00 Total effective +ve charge = 3.00 Overall = 0.00

EV model shared interstitials CN = 8 l = 1

Substitution for vanadium octahedron. Scheme 9a

4.0 { V(V) O(Oa,2) O(Oe,2) } --> { M(V)( 4') O(Oa,2) O(Oe,2) O(Ois, 1.0)(") } + 3.0 { V(V) O(Oa,2) O(Oe) [](Oe)(..) }

Total effective -ve charge = -6.00 Total effective +ve charge = 6.00 Overall = 0.00

Substitution for vanadium tetrahedron. Scheme 9b

{ V(V) O(Oa,2) O(Oe) [](Oe) } + 4.0{ V(V) O(Oa,2) O(Oe,2) } --> { M(V)( 4') O(Oa,2) O(Oe) O(Oe)(") O(Ois, 1.0)(") } + 4.0 { V(V) O(Oa,2) O(Oe) [](Oe)(..) }

Total effective -ve charge = -8.00 Total effective +ve charge = 8.00 Overall = 0.00

Substitution for average vanadium polyhedron. Scheme 9c

8 { V(V) O(Oa,2) O(Oe,1.5) [](Oe,0.5) } --> { M(V)( 4') O(Oa,2) O(Oe,1.5) O(Oe,0.5)(") O(Ois, 1.0)(") } + 7 { V(V) O(Oa,2) O(Oe) [](Oe)(.) }

Total effective -ve charge = -7.00 Total effective +ve charge = 7.00 Overall = 0.00

EV model unshared interstitials CN = 8 l = 1

Substitution for vanadium octahedron. Scheme 10a

5.0 { V(V) O(Oa,2) O(Oe,2) } --> { M(V)( 4') O(Oa,2) O(Oe,2) O(Oiu, 2.0)(") } + 4.0 { V(V) O(Oa,2) O(Oe) [](Oe)(..) }

Total effective -ve charge = -8.00 Total effective +ve charge = 8.00 Overall = 0.00

Substitution for vanadium tetrahedron. Scheme 10b

{ V(V) O(Oa,2) O(Oe) [](Oe) } + 5.0{ V(V) O(Oa,2) O(Oe,2) } --> { M(V)( 4') O(Oa,2) O(Oe) O(Oe)(") O(Oiu, 2.0)(") } + 5.0 { V(V) O(Oa,2) O(Oe) [](Oe)(..) }

Total effective -ve charge = -10.00 Total effective +ve charge = 10.00 Overall = 0.00

Substitution for average vanadium polyhedron. Scheme 10c

10 { V(V) O(Oa,2) O(Oe,1.5) [](Oe,0.5) } --> { M(V)( 4') O(Oa,2) O(Oe,1.5) O(Oe,0.5)(") O(Oiu, 2.0)(") } + 9 { V(V) O(Oa,2) O(Oe) [](Oe)(.) }

Total effective -ve charge = -9.00 Total effective +ve charge = 9.00 Overall = 0.00

AV model shared interstitials CN = 8 l = 1

Substitution for vanadium octahedron. Scheme 11a

2.500 { V(V) O(Oa,2) O(Oe,2) } --> { M(V)( 4') O(Oa,2) O(Oe,2) O(Ois, 1.0)(") } + 1.500 { V(V) [](Oa,2)(..) O(Oe,2) }

Total effective -ve charge = -6.00 Total effective +ve charge = 6.00 Overall = 0.00

Substitution for vanadium tetrahedron. Scheme 11b

{ V(V) [](Oa,2) O(Oe,2) } + 2.500{ V(V) O(Oa,2) O(Oe,2) } --> { M(V)( 4') O(Oa,2)(") O(Oe,2) O(Ois, 1.0)(") } + 2.500 { V(V) [](Oa,2)(..) O(Oe,2) }

Total effective -ve charge = -10.00 Total effective +ve charge = 10.00 Overall = 0.00

Substitution for average vanadium polyhedron. Scheme 11c

3.333 { V(V) O(Oa,1.5) [](Oa,0.5) O(Oe,2) } --> { M(V)( 4') O(Oa,2)(0.5') O(Oe,2) O(Ois, 1.0)(") } + 2.333 { V(V) [](Oa,2)(1.5 .) O(Oe,2) }

Total effective -ve charge = -7.00 Total effective +ve charge = 7.00 Overall = 0.00

AV model unshared interstitials CN = 8 l = 1

Substitution for vanadium octahedron. Scheme 12a

3.000 { V(V) O(Oa,2) O(Oe,2) } --> { M(V)( 4') O(Oa,2) O(Oe,2) O(Oiu, 2.0)(") } + 2.000 { V(V) [](Oa,2)(..) O(Oe,2) }

Total effective -ve charge = -8.00 Total effective +ve charge = 8.00 Overall = 0.00

Substitution for vanadium tetrahedron. Scheme 12b

{ V(V) [](Oa,2) O(Oe,2) } + 3.000{ V(V) O(Oa,2) O(Oe,2) } --> { M(V)( 4') O(Oa,2)(") O(Oe,2) O(Oiu, 2.0)(") } + 3.000 { V(V) [](Oa,2)(..) O(Oe,2) }

Total effective -ve charge = -12.00 Total effective +ve charge = 12.00 Overall = 0.00

Substitution for average vanadium polyhedron. Scheme 12c

4.000 { V(V) O(Oa,1.5) [](Oa,0.5) O(Oe,2) } --> { M(V)( 4') O(Oa,2)(0.5') O(Oe,2) O(Oiu, 2.0)(") } + 3.000 { V(V) [](Oa,2)(1.5 .) O(Oe,2) }

Total effective -ve charge = -9.00 Total effective +ve charge = 9.00 Overall = 0.00

EV model shared interstitials CN = 8 l = 2

Substitution for vanadium octahedron. Scheme 9a

3.5 { V(V) O(Oa,2) O(Oe,2) } --> { M(V)( 3') O(Oa,2) O(Oe,2) O(Ois, 1.0)(") } + 2.5 { V(V) O(Oa,2) O(Oe) [](Oe)(..) }

Total effective -ve charge = -5.00 Total effective +ve charge = 5.00 Overall = 0.00

Substitution for vanadium tetrahedron. Scheme 9b

{ V(V) O(Oa,2) O(Oe) [](Oe) } + 3.5{ V(V) O(Oa,2) O(Oe,2) } --> { M(V)( 3') O(Oa,2) O(Oe) O(Oe)(") O(Ois, 1.0)(") } + 3.5 { V(V) O(Oa,2) O(Oe) [](Oe)(..) }

Total effective -ve charge = -7.00 Total effective +ve charge = 7.00 Overall = 0.00

Substitution for average vanadium polyhedron. Scheme 9c

7 { V(V) O(Oa,2) O(Oe,1.5) [](Oe,0.5) } --> { M(V)( 3') O(Oa,2) O(Oe,1.5) O(Oe,0.5)(") O(Ois, 1.0)(") } + 6 { V(V) O(Oa,2) O(Oe) [](Oe)(.) }

Total effective -ve charge = -6.00 Total effective +ve charge = 6.00 Overall = 0.00

EV model unshared interstitials CN = 8 l = 2

Substitution for vanadium octahedron. Scheme 10a

4.5 { V(V) O(Oa,2) O(Oe,2) } --> { M(V)( 3') O(Oa,2) O(Oe,2) O(Oiu, 2.0)(") } + 3.5 { V(V) O(Oa,2) O(Oe) [](Oe)(..) }

Total effective -ve charge = -7.00 Total effective +ve charge = 7.00 Overall = 0.00

Substitution for vanadium tetrahedron. Scheme 10b

{ V(V) O(Oa,2) O(Oe) [](Oe) } + 4.5{ V(V) O(Oa,2) O(Oe,2) } --> { M(V)( 3') O(Oa,2) O(Oe) O(Oe)(") O(Oiu, 2.0)(") } + 4.5 { V(V) O(Oa,2) O(Oe) [](Oe)(..) }

Total effective -ve charge = -9.00 Total effective +ve charge = 9.00 Overall = 0.00

Substitution for average vanadium polyhedron. Scheme 10c

9 { V(V) O(Oa,2) O(Oe,1.5) [](Oe,0.5) } --> { M(V)( 3') O(Oa,2) O(Oe,1.5) O(Oe,0.5)(") O(Oiu, 2.0)(") } + 8 { V(V) O(Oa,2) O(Oe) [](Oe)(.) }

Total effective -ve charge = -8.00 Total effective +ve charge = 8.00 Overall = 0.00

AV model shared interstitials CN = 8 l = 2

Substitution for vanadium octahedron. Scheme 11a

2.250 { V(V) O(Oa,2) O(Oe,2) } --> { M(V)( 3') O(Oa,2) O(Oe,2) O(Ois, 1.0)(") } + 1.250 { V(V) [](Oa,2)(..) O(Oe,2) }

Total effective -ve charge = -5.00 Total effective +ve charge = 5.00 Overall = 0.00

Substitution for vanadium tetrahedron. Scheme 11b

{ V(V) [](Oa,2) O(Oe,2) } + 2.250{ V(V) O(Oa,2) O(Oe,2) } --> { M(V)( 3') O(Oa,2)(") O(Oe,2) O(Ois, 1.0)(") } + 2.250 { V(V) [](Oa,2)(..) O(Oe,2) }

Total effective -ve charge = -9.00 Total effective +ve charge = 9.00 Overall = 0.00

Substitution for average vanadium polyhedron. Scheme 11c

3.000 { V(V) O(Oa,1.5) [](Oa,0.5) O(Oe,2) } --> { M(V)( 3') O(Oa,2)(0.5') O(Oe,2) O(Ois, 1.0)(") } + 2.000 { V(V) [](Oa,2)(1.5 .) O(Oe,2) }

Total effective -ve charge = -6.00 Total effective +ve charge = 6.00 Overall = 0.00

AV model unshared interstitials CN = 8 l = 2

Substitution for vanadium octahedron. Scheme 12a

2.750 { V(V) O(Oa,2) O(Oe,2) } --> { M(V)( 3') O(Oa,2) O(Oe,2) O(Oiu, 2.0)(") } + 1.750 { V(V) [](Oa,2)(..) O(Oe,2) }

Total effective -ve charge = -7.00 Total effective +ve charge = 7.00 Overall = 0.00

Substitution for vanadium tetrahedron. Scheme 12b

{ V(V) [](Oa,2) O(Oe,2) } + 2.750{ V(V) O(Oa,2) O(Oe,2) } --> { M(V)( 3') O(Oa,2)(") O(Oe,2) O(Oiu, 2.0)(") } + 2.750 { V(V) [](Oa,2)(..) O(Oe,2) }

Total effective -ve charge = -11.00 Total effective +ve charge = 11.00 Overall = 0.00

Substitution for average vanadium polyhedron. Scheme 12c

3.667 { V(V) O(Oa,1.5) [](Oa,0.5) O(Oe,2) } --> { M(V)( 3') O(Oa,2)(0.5') O(Oe,2) O(Oiu, 2.0)(") } + 2.667 { V(V) [](Oa,2)(1.5 .) O(Oe,2) }

Total effective -ve charge = -8.00 Total effective +ve charge = 8.00 Overall = 0.00

EV model shared interstitials CN = 8 l = 3

Substitution for vanadium octahedron. Scheme 9a

3.0 { V(V) O(Oa,2) O(Oe,2) } --> { M(V)( 2') O(Oa,2) O(Oe,2) O(Ois, 1.0)(") } + 2.0 { V(V) O(Oa,2) O(Oe) [](Oe)(..) }

Total effective -ve charge = -4.00 Total effective +ve charge = 4.00 Overall = 0.00

Substitution for vanadium tetrahedron. Scheme 9b

{ V(V) O(Oa,2) O(Oe) [](Oe) } + 3.0{ V(V) O(Oa,2) O(Oe,2) } --> { M(V)( 2') O(Oa,2) O(Oe) O(Oe)(") O(Ois, 1.0)(") } + 3.0 { V(V) O(Oa,2) O(Oe) [](Oe)(..) }

Total effective -ve charge = -6.00 Total effective +ve charge = 6.00 Overall = 0.00

Substitution for average vanadium polyhedron. Scheme 9c

6 { V(V) O(Oa,2) O(Oe,1.5) [](Oe,0.5) } --> { M(V)( 2') O(Oa,2) O(Oe,1.5) O(Oe,0.5)(") O(Ois, 1.0)(") } + 5 { V(V) O(Oa,2) O(Oe) [](Oe)(.) }

Total effective -ve charge = -5.00 Total effective +ve charge = 5.00 Overall = 0.00

EV model unshared interstitials CN = 8 l = 3

Substitution for vanadium octahedron. Scheme 10a

4.0 { V(V) O(Oa,2) O(Oe,2) } --> { M(V)( 2') O(Oa,2) O(Oe,2) O(Oiu, 2.0)(") } + 3.0 { V(V) O(Oa,2) O(Oe) [](Oe)(..) }

Total effective -ve charge = -6.00 Total effective +ve charge = 6.00 Overall = 0.00

Substitution for vanadium tetrahedron. Scheme 10b

{ V(V) O(Oa,2) O(Oe) [](Oe) } + 4.0{ V(V) O(Oa,2) O(Oe,2) } --> { M(V)( 2') O(Oa,2) O(Oe) O(Oe)(") O(Oiu, 2.0)(") } + 4.0 { V(V) O(Oa,2) O(Oe) [](Oe)(..) }

Total effective -ve charge = -8.00 Total effective +ve charge = 8.00 Overall = 0.00

Substitution for average vanadium polyhedron. Scheme 10c

8 { V(V) O(Oa,2) O(Oe,1.5) [](Oe,0.5) } --> { M(V)( 2') O(Oa,2) O(Oe,1.5) O(Oe,0.5)(") O(Oiu, 2.0)(") } + 7 { V(V) O(Oa,2) O(Oe) [](Oe)(.) }

Total effective -ve charge = -7.00 Total effective +ve charge = 7.00 Overall = 0.00

AV model shared interstitials CN = 8 l = 3

Substitution for vanadium octahedron. Scheme 11a

2.000 { V(V) O(Oa,2) O(Oe,2) } --> { M(V)( 2') O(Oa,2) O(Oe,2) O(Ois, 1.0)(") } + 1.000 { V(V) [](Oa,2)(..) O(Oe,2) }

Total effective -ve charge = -4.00 Total effective +ve charge = 4.00 Overall = 0.00

Substitution for vanadium tetrahedron. Scheme 11b

{ V(V) [](Oa,2) O(Oe,2) } + 2.000{ V(V) O(Oa,2) O(Oe,2) } --> { M(V)( 2') O(Oa,2)(") O(Oe,2) O(Ois, 1.0)(") } + 2.000 { V(V) [](Oa,2)(..) O(Oe,2) }

Total effective -ve charge = -8.00 Total effective +ve charge = 8.00 Overall = 0.00

Substitution for average vanadium polyhedron. Scheme 11c

2.667 { V(V) O(Oa,1.5) [](Oa,0.5) O(Oe,2) } --> { M(V)( 2') O(Oa,2)(0.5') O(Oe,2) O(Ois, 1.0)(") } + 1.667 { V(V) [](Oa,2)(1.5 .) O(Oe,2) }

Total effective -ve charge = -5.00 Total effective +ve charge = 5.00 Overall = 0.00

AV model unshared interstitials CN = 8 l = 3

Substitution for vanadium octahedron. Scheme 12a

2.500 { V(V) O(Oa,2) O(Oe,2) } --> { M(V)( 2') O(Oa,2) O(Oe,2) O(Oiu, 2.0)(") } + 1.500 { V(V) [](Oa,2)(..) O(Oe,2) }

Total effective -ve charge = -6.00 Total effective +ve charge = 6.00 Overall = 0.00

Substitution for vanadium tetrahedron. Scheme 12b

{ V(V) [](Oa,2) O(Oe,2) } + 2.500{ V(V) O(Oa,2) O(Oe,2) } --> { M(V)( 2') O(Oa,2)(") O(Oe,2) O(Oiu, 2.0)(") } + 2.500 { V(V) [](Oa,2)(..) O(Oe,2) }

Total effective -ve charge = -10.00 Total effective +ve charge = 10.00 Overall = 0.00

Substitution for average vanadium polyhedron. Scheme 12c

3.333 { V(V) O(Oa,1.5) [](Oa,0.5) O(Oe,2) } --> { M(V)( 2') O(Oa,2)(0.5') O(Oe,2) O(Oiu, 2.0)(") } + 2.333 { V(V) [](Oa,2)(1.5 .) O(Oe,2) }

Total effective -ve charge = -7.00 Total effective +ve charge = 7.00 Overall = 0.00

EV model shared interstitials CN = 8 l = 4

Substitution for vanadium octahedron. Scheme 9a

2.5 { V(V) O(Oa,2) O(Oe,2) } --> { M(V)( 1') O(Oa,2) O(Oe,2) O(Ois, 1.0)(") } + 1.5 { V(V) O(Oa,2) O(Oe) [](Oe)(..) }

Total effective -ve charge = -3.00 Total effective +ve charge = 3.00 Overall = 0.00

Substitution for vanadium tetrahedron. Scheme 9b

{ V(V) O(Oa,2) O(Oe) [](Oe) } + 2.5{ V(V) O(Oa,2) O(Oe,2) } --> { M(V)( 1') O(Oa,2) O(Oe) O(Oe)(") O(Ois, 1.0)(") } + 2.5 { V(V) O(Oa,2) O(Oe) [](Oe)(..) }

Total effective -ve charge = -5.00 Total effective +ve charge = 5.00 Overall = 0.00

Substitution for average vanadium polyhedron. Scheme 9c

5 { V(V) O(Oa,2) O(Oe,1.5) [](Oe,0.5) } --> { M(V)( 1') O(Oa,2) O(Oe,1.5) O(Oe,0.5)(") O(Ois, 1.0)(") } + 4 { V(V) O(Oa,2) O(Oe) [](Oe)(.) }

Total effective -ve charge = -4.00 Total effective +ve charge = 4.00 Overall = 0.00

EV model unshared interstitials CN = 8 l = 4

Substitution for vanadium octahedron. Scheme 10a

3.5 { V(V) O(Oa,2) O(Oe,2) } --> { M(V)( 1') O(Oa,2) O(Oe,2) O(Oiu, 2.0)(") } + 2.5 { V(V) O(Oa,2) O(Oe) [](Oe)(..) }

Total effective -ve charge = -5.00 Total effective +ve charge = 5.00 Overall = 0.00

Substitution for vanadium tetrahedron. Scheme 10b

{ V(V) O(Oa,2) O(Oe) [](Oe) } + 3.5{ V(V) O(Oa,2) O(Oe,2) } --> { M(V)( 1') O(Oa,2) O(Oe) O(Oe)(") O(Oiu, 2.0)(") } + 3.5 { V(V) O(Oa,2) O(Oe) [](Oe)(..) }

Total effective -ve charge = -7.00 Total effective +ve charge = 7.00 Overall = 0.00

Substitution for average vanadium polyhedron. Scheme 10c

7 { V(V) O(Oa,2) O(Oe,1.5) [](Oe,0.5) } --> { M(V)( 1') O(Oa,2) O(Oe,1.5) O(Oe,0.5)(") O(Oiu, 2.0)(") } + 6 { V(V) O(Oa,2) O(Oe) [](Oe)(.) }

Total effective -ve charge = -6.00 Total effective +ve charge = 6.00 Overall = 0.00

AV model shared interstitials CN = 8 l = 4

Substitution for vanadium octahedron. Scheme 11a

1.750 { V(V) O(Oa,2) O(Oe,2) } --> { M(V)( 1') O(Oa,2) O(Oe,2) O(Ois, 1.0)(") } + 0.750 { V(V) [](Oa,2)(..) O(Oe,2) }

Total effective -ve charge = -3.00 Total effective +ve charge = 3.00 Overall = 0.00

Substitution for vanadium tetrahedron. Scheme 11b

{ V(V) [](Oa,2) O(Oe,2) } + 1.750{ V(V) O(Oa,2) O(Oe,2) } --> { M(V)( 1') O(Oa,2)(") O(Oe,2) O(Ois, 1.0)(") } + 1.750 { V(V) [](Oa,2)(..) O(Oe,2) }

Total effective -ve charge = -7.00 Total effective +ve charge = 7.00 Overall = 0.00

Substitution for average vanadium polyhedron. Scheme 11c

2.333 { V(V) O(Oa,1.5) [](Oa,0.5) O(Oe,2) } --> { M(V)( 1') O(Oa,2)(0.5') O(Oe,2) O(Ois, 1.0)(") } + 1.333 { V(V) [](Oa,2)(1.5 .) O(Oe,2) }

Total effective -ve charge = -4.00 Total effective +ve charge = 4.00 Overall = 0.00

AV model unshared interstitials CN = 8 l = 4

Substitution for vanadium octahedron. Scheme 12a

2.250 { V(V) O(Oa,2) O(Oe,2) } --> { M(V)( 1') O(Oa,2) O(Oe,2) O(Oiu, 2.0)(") } + 1.250 { V(V) [](Oa,2)(..) O(Oe,2) }

Total effective -ve charge = -5.00 Total effective +ve charge = 5.00 Overall = 0.00

Substitution for vanadium tetrahedron. Scheme 12b

{ V(V) [](Oa,2) O(Oe,2) } + 2.250{ V(V) O(Oa,2) O(Oe,2) } --> { M(V)( 1') O(Oa,2)(") O(Oe,2) O(Oiu, 2.0)(") } + 2.250 { V(V) [](Oa,2)(..) O(Oe,2) }

Total effective -ve charge = -9.00 Total effective +ve charge = 9.00 Overall = 0.00

Substitution for average vanadium polyhedron. Scheme 12c

3.000 { V(V) O(Oa,1.5) [](Oa,0.5) O(Oe,2) } --> { M(V)( 1') O(Oa,2)(0.5') O(Oe,2) O(Oiu, 2.0)(") } + 2.000 { V(V) [](Oa,2)(1.5 .) O(Oe,2) }

Total effective -ve charge = -6.00 Total effective +ve charge = 6.00 Overall = 0.00

EV model shared interstitials CN = 8 l = 5

Substitution for vanadium octahedron. Scheme 9a

2.0 { V(V) O(Oa,2) O(Oe,2) } --> { M(V)( 0') O(Oa,2) O(Oe,2) O(Ois, 1.0)(") } + 1.0 { V(V) O(Oa,2) O(Oe) [](Oe)(..) }

Total effective -ve charge = -2.00 Total effective +ve charge = 2.00 Overall = 0.00

Substitution for vanadium tetrahedron. Scheme 9b

{ V(V) O(Oa,2) O(Oe) [](Oe) } + 2.0{ V(V) O(Oa,2) O(Oe,2) } --> { M(V)( 0') O(Oa,2) O(Oe) O(Oe)(") O(Ois, 1.0)(") } + 2.0 { V(V) O(Oa,2) O(Oe) [](Oe)(..) }

Total effective -ve charge = -4.00 Total effective +ve charge = 4.00 Overall = 0.00

Substitution for average vanadium polyhedron. Scheme 9c

4 { V(V) O(Oa,2) O(Oe,1.5) [](Oe,0.5) } --> { M(V)( 0') O(Oa,2) O(Oe,1.5) O(Oe,0.5)(") O(Ois, 1.0)(") } + 3 { V(V) O(Oa,2) O(Oe) [](Oe)(.) }

Total effective -ve charge = -3.00 Total effective +ve charge = 3.00 Overall = 0.00

EV model unshared interstitials CN = 8 l = 5

Substitution for vanadium octahedron. Scheme 10a

3.0 { V(V) O(Oa,2) O(Oe,2) } --> { M(V)( 0') O(Oa,2) O(Oe,2) O(Oiu, 2.0)(") } + 2.0 { V(V) O(Oa,2) O(Oe) [](Oe)(..) }

Total effective -ve charge = -4.00 Total effective +ve charge = 4.00 Overall = 0.00

Substitution for vanadium tetrahedron. Scheme 10b

{ V(V) O(Oa,2) O(Oe) [](Oe) } + 3.0{ V(V) O(Oa,2) O(Oe,2) } --> { M(V)( 0') O(Oa,2) O(Oe) O(Oe)(") O(Oiu, 2.0)(") } + 3.0 { V(V) O(Oa,2) O(Oe) [](Oe)(..) }

Total effective -ve charge = -6.00 Total effective +ve charge = 6.00 Overall = 0.00

Substitution for average vanadium polyhedron. Scheme 10c

6 { V(V) O(Oa,2) O(Oe,1.5) [](Oe,0.5) } --> { M(V)( 0') O(Oa,2) O(Oe,1.5) O(Oe,0.5)(") O(Oiu, 2.0)(") } + 5 { V(V) O(Oa,2) O(Oe) [](Oe)(.) }

Total effective -ve charge = -5.00 Total effective +ve charge = 5.00 Overall = 0.00

AV model shared interstitials CN = 8 l = 5

Substitution for vanadium octahedron. Scheme 11a

1.500 { V(V) O(Oa,2) O(Oe,2) } --> { M(V)( 0') O(Oa,2) O(Oe,2) O(Ois, 1.0)(") } + 0.500 { V(V) [](Oa,2)(..) O(Oe,2) }

Total effective -ve charge = -2.00 Total effective +ve charge = 2.00 Overall = 0.00

Substitution for vanadium tetrahedron. Scheme 11b

{ V(V) [](Oa,2) O(Oe,2) } + 1.500{ V(V) O(Oa,2) O(Oe,2) } --> { M(V)( 0') O(Oa,2)(") O(Oe,2) O(Ois, 1.0)(") } + 1.500 { V(V) [](Oa,2)(..) O(Oe,2) }

Total effective -ve charge = -6.00 Total effective +ve charge = 6.00 Overall = 0.00

Substitution for average vanadium polyhedron. Scheme 11c

2.000 { V(V) O(Oa,1.5) [](Oa,0.5) O(Oe,2) } --> { M(V)( 0') O(Oa,2)(0.5') O(Oe,2) O(Ois, 1.0)(") } + 1.000 { V(V) [](Oa,2)(1.5 .) O(Oe,2) }

Total effective -ve charge = -3.00 Total effective +ve charge = 3.00 Overall = 0.00

AV model unshared interstitials CN = 8 l = 5

Substitution for vanadium octahedron. Scheme 12a

2.000 { V(V) O(Oa,2) O(Oe,2) } --> { M(V)( 0') O(Oa,2) O(Oe,2) O(Oiu, 2.0)(") } + 1.000 { V(V) [](Oa,2)(..) O(Oe,2) }

Total effective -ve charge = -4.00 Total effective +ve charge = 4.00 Overall = 0.00

Substitution for vanadium tetrahedron. Scheme 12b

{ V(V) [](Oa,2) O(Oe,2) } + 2.000{ V(V) O(Oa,2) O(Oe,2) } --> { M(V)( 0') O(Oa,2)(") O(Oe,2) O(Oiu, 2.0)(") } + 2.000 { V(V) [](Oa,2)(..) O(Oe,2) }

Total effective -ve charge = -8.00 Total effective +ve charge = 8.00 Overall = 0.00

Substitution for average vanadium polyhedron. Scheme 12c

2.667 { V(V) O(Oa,1.5) [](Oa,0.5) O(Oe,2) } --> { M(V)( 0') O(Oa,2)(0.5') O(Oe,2) O(Oiu, 2.0)(") } + 1.667 { V(V) [](Oa,2)(1.5 .) O(Oe,2) }

Total effective -ve charge = -5.00 Total effective +ve charge = 5.00 Overall = 0.00

EV model shared interstitials CN = 8 l = 6

Substitution for vanadium octahedron. Scheme 9a

1.5 { V(V) O(Oa,2) O(Oe,2) } --> { M(V)(-1') O(Oa,2) O(Oe,2) O(Ois, 1.0)(") } + 0.5 { V(V) O(Oa,2) O(Oe) [](Oe)(..) }

Total effective -ve charge = -2.00 Total effective +ve charge = 2.00 Overall = 0.00

Substitution for vanadium tetrahedron. Scheme 9b

{ V(V) O(Oa,2) O(Oe) [](Oe) } + 1.5{ V(V) O(Oa,2) O(Oe,2) } --> { M(V)(-1') O(Oa,2) O(Oe) O(Oe)(") O(Ois, 1.0)(") } + 1.5 { V(V) O(Oa,2) O(Oe) [](Oe)(..) }

Total effective -ve charge = -4.00 Total effective +ve charge = 4.00 Overall = 0.00

Substitution for average vanadium polyhedron. Scheme 9c

3 { V(V) O(Oa,2) O(Oe,1.5) [](Oe,0.5) } --> { M(V)(-1') O(Oa,2) O(Oe,1.5) O(Oe,0.5)(") O(Ois, 1.0)(") } + 2 { V(V) O(Oa,2) O(Oe) [](Oe)(.) }

Total effective -ve charge = -3.00 Total effective +ve charge = 3.00 Overall = 0.00

EV model unshared interstitials CN = 8 l = 6

Substitution for vanadium octahedron. Scheme 10a

2.5 { V(V) O(Oa,2) O(Oe,2) } --> { M(V)(-1') O(Oa,2) O(Oe,2) O(Oiu, 2.0)(") } + 1.5 { V(V) O(Oa,2) O(Oe) [](Oe)(..) }

Total effective -ve charge = -4.00 Total effective +ve charge = 4.00 Overall = 0.00

Substitution for vanadium tetrahedron. Scheme 10b

{ V(V) O(Oa,2) O(Oe) [](Oe) } + 2.5{ V(V) O(Oa,2) O(Oe,2) } --> { M(V)(-1') O(Oa,2) O(Oe) O(Oe)(") O(Oiu, 2.0)(") } + 2.5 { V(V) O(Oa,2) O(Oe) [](Oe)(..) }

Total effective -ve charge = -6.00 Total effective +ve charge = 6.00 Overall = 0.00

Substitution for average vanadium polyhedron. Scheme 10c

5 { V(V) O(Oa,2) O(Oe,1.5) [](Oe,0.5) } --> { M(V)(-1') O(Oa,2) O(Oe,1.5) O(Oe,0.5)(") O(Oiu, 2.0)(") } + 4 { V(V) O(Oa,2) O(Oe) [](Oe)(.) }

Total effective -ve charge = -5.00 Total effective +ve charge = 5.00 Overall = 0.00

AV model shared interstitials CN = 8 l = 6

Substitution for vanadium octahedron. Scheme 11a

1.250 { V(V) O(Oa,2) O(Oe,2) } --> { M(V)(-1') O(Oa,2) O(Oe,2) O(Ois, 1.0)(") } + 0.250 { V(V) [](Oa,2)(..) O(Oe,2) }

Total effective -ve charge = -2.00 Total effective +ve charge = 2.00 Overall = 0.00

Substitution for vanadium tetrahedron. Scheme 11b

{ V(V) [](Oa,2) O(Oe,2) } + 1.250{ V(V) O(Oa,2) O(Oe,2) } --> { M(V)(-1') O(Oa,2)(") O(Oe,2) O(Ois, 1.0)(") } + 1.250 { V(V) [](Oa,2)(..) O(Oe,2) }

Total effective -ve charge = -6.00 Total effective +ve charge = 6.00 Overall = 0.00

Substitution for average vanadium polyhedron. Scheme 11c

1.667 { V(V) O(Oa,1.5) [](Oa,0.5) O(Oe,2) } --> { M(V)(-1') O(Oa,2)(0.5') O(Oe,2) O(Ois, 1.0)(") } + 0.667 { V(V) [](Oa,2)(1.5 .) O(Oe,2) }

Total effective -ve charge = -3.00 Total effective +ve charge = 3.00 Overall = 0.00

AV model unshared interstitials CN = 8 l = 6

Substitution for vanadium octahedron. Scheme 12a

1.750 { V(V) O(Oa,2) O(Oe,2) } --> { M(V)(-1') O(Oa,2) O(Oe,2) O(Oiu, 2.0)(") } + 0.750 { V(V) [](Oa,2)(..) O(Oe,2) }

Total effective -ve charge = -4.00 Total effective +ve charge = 4.00 Overall = 0.00

Substitution for vanadium tetrahedron. Scheme 12b

{ V(V) [](Oa,2) O(Oe,2) } + 1.750{ V(V) O(Oa,2) O(Oe,2) } --> { M(V)(-1') O(Oa,2)(") O(Oe,2) O(Oiu, 2.0)(") } + 1.750 { V(V) [](Oa,2)(..) O(Oe,2) }

Total effective -ve charge = -8.00 Total effective +ve charge = 8.00 Overall = 0.00

Substitution for average vanadium polyhedron. Scheme 12c

2.333 { V(V) O(Oa,1.5) [](Oa,0.5) O(Oe,2) } --> { M(V)(-1') O(Oa,2)(0.5') O(Oe,2) O(Oiu, 2.0)(") } + 1.333 { V(V) [](Oa,2)(1.5 .) O(Oe,2) }

Total effective -ve charge = -5.00 Total effective +ve charge = 5.00 Overall = 0.00
